## 22 **Abstract**

23 The Pyrrolysyl-tRNA synthetase (PylRS) and its cognate tRNA<sup>Pyl</sup> are used to facilitate  
24 the incorporation of non-canonical amino acids (ncAAs) into the genetic code of bacterial  
25 and eukaryotic cells by orthogonally reassigning the amber codon. Currently, the  
26 incorporation of new ncAAs requires a cumbersome engineering process composed of  
27 several positive and negative selection rounds to select the appropriate PylRS/tRNA<sup>Pyl</sup>  
28 pair. Our fast and sensitive engineering approach required only a single FACS selection  
29 round to identify 110 orthogonal PylRS variants for the aminoacylation of 20 ncAAs.  
30 Pocket-substrate relationship from these variants led to the design of a highly  
31 promiscuous PylRS (HpRS), which catalyzed the aminoacylation of 31 structurally  
32 diverse lysine derivatives bearing clickable, fluorinated, fluorescent, and biotinylated  
33 entities. The high speed and sensitivity of our approach provides a competitive  
34 alternative to existing screening methodologies, and delivers insights into the complex  
35 PylRS-substrate interactions to facilitate the generation of additional promiscuous  
36 variants.

37

## 38 Introduction

39 Site-specific incorporation of non-canonical amino acids (ncAAs) is a powerful tool to  
40 implement novel functions into the proteome, providing a plethora of opportunities to  
41 probe and engineer the protein structure (1-5). The central element of an effective and  
42 selective ncAA incorporation system is a heterogeneous aminoacyl-tRNA  
43 synthetase/tRNA (aaRS/tRNA) pair that does not cross-react with the original aaRSs,  
44 tRNAs, or canonical amino acids of the host cell (6). The pyrrolysyl-tRNA  
45 synthetase/tRNA<sup>Pyl</sup> pair (PylRS/tRNA<sup>Pyl</sup>) has become a popular choice for the genetic  
46 code expansion (7, 8). This success is mainly attributed to the substrate flexibility of the  
47 active site (9, 10), the orthogonality in prokaryotic and eukaryotic cells (11), and the  
48 inherent suppression of the amber codon (8). Although over 150 ncAAs were genetically  
49 encoded during the past decade, these structures were mainly based on a few core  
50 motifs (1). Several structural functionalities still remain elusive, e.g., glycosylated or  
51 biotinylated ncAAs. The main factor limiting further expansion of the genetic code is the  
52 complex and slow process of engineering suitable aaRS/tRNA pairs. The engineering  
53 process requires the construction of large mutant libraries from which all non-functional  
54 and non-orthogonal aaRS variants must be eliminated through alternating rounds of  
55 positive and negative selection (2).

56 In most cases, positive and negative selection screens based on antibiotic resistance or  
57 toxic gene expression are carried out as dead-and-alive assays on agar plates (2, 12,  
58 13). However, in this approach, the selection conditions are hardly tunable over a broad  
59 dynamic range (5, 6). Therefore, a beneficial aaRS might be accidentally eliminated due  
60 to slow cell growth and insufficient expression of the antibiotic resistance (14). The aaRS

61 mediated ncAA incorporation in a fluorescent reporter protein provides a more sensitive  
62 and quantitative read-out (15).

63 Screens based on fluorescence-activated cell sorting (FACS) have been successfully  
64 applied to evolve the aaRS specificity (16-18). However, the reported experimental  
65 setups were not optimized for the intrinsically orthogonal PylRS and involved several  
66 negative and positive selection rounds, resulting in a cumbersome FACS screening  
67 process. For example, seven alternating rounds of positive and negative selection  
68 screens were required to sort tyrosyl-tRNA synthetases (TyrRS) with specificity for O-  
69 methyl-L-tyrosine (17). Since TyrRS naturally aminoacylates the canonical amino acid  
70 tyrosine, the negative selection screen was necessary to exclude the non-orthogonal  
71 variants.

72 Here, we describe a FACS-based screen that takes advantage of the orthogonality of  
73 the PylRS/tRNA<sup>Pyl</sup> pair and involves only a single, positive selection to identify functional  
74 PylRS variants. Unlike previously reported screens that sought aaRS/tRNA pairs with  
75 high activity for a specific ncAA, our approach identifies a substantial number of PylRS  
76 variants for the same ncAA. We then used the information on pocket-substrate  
77 relationship from these variants to engineer a PylRS that aminoacylates a broad range  
78 of lysine derivatives. We term this variant “highly promiscuous pyrrolysyl-tRNA  
79 synthetase” (HpRS).

80

## 81 **Results**

82 Directed evolution of proteins has emerged as the method of choice to improve or alter  
83 properties of enzymes (19). Usually, three elements determine the efficiency of the

84 screening process: i) library design, ii) choice of reporter and iii) screening methodology.  
85 All three should be compatible as well as to be feasible in the same order of magnitude  
86 to avoid becoming a bottleneck.

## 87 **Library design**

88 We based the design of our mutant library on a homology model of the *Methanosarcina*  
89 *barkeri* (*M. barkeri*) PyIRS (Figure 1A). Since the mutation Y349F is known to enhance  
90 the aminoacylation efficiency of PyIRS (9), this mutation was included in the mutant  
91 library by default. The N311 position plays an important role as a selection filter in the  
92 substrate recognition of *M. barkeri* PyIRS. While asparagine forms a H-bond with the  
93 carbamate group of ncAAs and facilitates their aminoacylation, the 20 canonical amino  
94 acids are excluded (20, 21). By retaining this position, we maintained the orthogonality  
95 of the active site; and thus, were able to eliminate the negative selection in our screen.  
96 The mutation V370R was previously shown to allow the aminoacylation of norbornene  
97 amino acids by PyIRS, due to a small shift of the  $\beta 7$ – $\beta 8$  hairpin caused by an H-bond  
98 between arginine and the backbone carbonyl of F349 and D351 (22). In line with these  
99 observations, the variability of the library at position 370 was limited to valine and the  
100 positively charged H-bond donors, arginine and lysine. The selected positions 271, 274,  
101 313, 315, 378 cover most of the binding pocket's surface and are in direct contact with  
102 the substrate. Therefore, the introduction of smaller residues at these positions possibly  
103 increased the volume of the pocket and allowed the aminoacylation of larger ncAAs.

104 Based on these structural considerations, we selected the six amino acids Y271, L274,  
105 C313, M315, V370, and I378 to create a relatively small, focused PyIRS library with  
106  $9.5 \times 10^4$  members (Figure 1B). The library was non-codon redundant and the codon

107 usage was optimized for *E. coli* to ensure the equal representation and expression level  
108 of all library variants. Correspondingly,  $4.4 \times 10^5$  mutants had to be screened to cover  
109 99% of all possible sequences within the mutant library (23).

## 110 **Choice of reporter**

111 Fluorescence-based screens provide a faster and more sensitive detection of ncAA  
112 incorporation than cell assays on selection media (15, 17). In our experiment, we chose  
113 the bright, cyan monomeric teal fluorescent protein 1 (mTFP1) (24) to report the ncAA  
114 incorporation. mTFP1 bears an amber codon at the permissive position 128. The  
115 aminoacylation of an ncAA by a corresponding PylRS/tRNA<sup>Pyl</sup> pair results in the  
116 suppression of the amber codon and a bright fluorescent signal upon excitation at 462  
117 nm from the matured mTFP1. In contrast, the lack of a charged tRNA<sup>Pyl</sup> leads to a  
118 truncated, non-fluorescent mTFP1. Thus, the aminoacylation efficiency can be quantified  
119 from fluorescence measurements (Figure 2A).

120 A one-plasmid system, pEVOL303\_Lib (Figure 2B), combined the required genetic  
121 components for the fluorescent screen – mTFP1<sub>TAG128</sub>, tRNA<sup>Pyl</sup>, and the PylRS library.  
122 The pEVOL303\_Lib harbored the independently inducible promoter systems pBAD and  
123 T7 downstream of the PylRS and mTFP1<sub>TAG128</sub>.

124

## 125 **Fluorescence-activated cell sorting screening**

126 *E. coli* cells containing pEVOL303\_Lib were grown both in the absence and presence of  
127 ncAAs **1–23** for 16 h (Figure 3). Then, the forward scatter and fluorescent signals of  
128 each cell were analyzed by Fluorescence-activated cell sorting (FACS). The fluorescent  
129 signals of the *E. coli* cells grown without ncAAs were negligible, i.e., the PylRS library

130 displayed no reactivity with the canonical amino acids (Figure 4A, left plot). In the  
131 presence of ncAA **1**, on the other hand, several cells depicted significant fluorescent  
132 signals (Figure 4A, right plot). Notably, the fluorescent cells appeared to be a  
133 heterogeneous population, suggesting that multiple PyIRS variants enabled the  
134 aminoacylation of ncAA **1**.

135 All fluorescent cells exceeding the set threshold were sorted on a 96-well plate supplied  
136 with conditioned medium and recovered overnight. The medium contained cell-secreted  
137 growth factors that improved the survival rate of single cells three-fold compared to the  
138 untreated Lysogeny broth (LB) medium (Figure 4B). In the case of ncAA **1**, seven cells  
139 were recovered after FACS screening, the plasmid pEVOL303\_Lib was purified and the  
140 PyIRS variants were sequenced (Figure 4C). Next, expression of mTFP1<sub>TAG128</sub> was  
141 repeated in the presence of the PyIRS variants, the tRNA<sup>PyI</sup> and ncAA **1** in *E. coli* cells.  
142 In all cases, the fluorescence measurements were in agreement with the FACS results  
143 and did not reveal any background expression of mTFP1 in the absence of ncAA **1**  
144 (Figure 4C).

145 Overall, 151 PyIRS variants (110 unique and 41 redundant) facilitating the incorporation  
146 of 20 out of the 23 tested ncAAs were developed. Seventeen PyIRS variants accepted  
147 multiple ncAAs. The ncAAs were aminoacylated by up to 16 different PyIRS  
148 (Supplementary Table 2). The amino acid abundancies of the six mutated positions (P1–  
149 P6) of all sorted PyIRS variants are summarized for each ncAA in a heat map (Figure 5).

150 We divided the tested ncAAs **1–23** into three distinct structural classes (Figure 3). Class  
151 I ncAAs **1–14** bear a linear aliphatic tail. Like a molecular ruler, these ncAAs allow to  
152 assess the maximum carbon chain length accepted by PyIRS based on the fluorescent

153 signal of the mTFP1 reporter. For example, ncAA **9** with 11 carbon atoms following the  
154 carbamate function exceeded the permissible chain length. Hence, no incorporation was  
155 detected. Interestingly, the cells tended to aggregate upon addition of ncAA **9**  
156 (Supplementary Figure 1). Our data suggest that the long hydrophobic tail of ncAA **9**  
157 cross-linked the cells and prevented its uptake into the cytoplasm. Class II ncAAs **15–17**  
158 are cyclic and can be used in strain-promoted cycloadditions for labeling of proteins (25,  
159 26). The higher steric demand of fluorinated side chains of class III ncAAs **18–23** might  
160 single out those PyIRS variants that accept particularly bulky ncAAs, since the volume of  
161 a CF<sub>3</sub> substituent (39.8 Å<sup>3</sup>) is about twice as big as a methyl-group (21.6 Å<sup>3</sup>) (27).  
162 Interestingly, the FACS screen detected the aminoacylation of the ncAAs **18–21**, but not  
163 ncAA **22** or **23** (Figure 5). These findings show that the (CH<sub>2</sub>)<sub>2</sub>(CF<sub>2</sub>)<sub>3</sub>-CF<sub>3</sub> side chain of  
164 ncAA **21** appeared to define the maximum length of fluorinated ncAAs in our PyIRS  
165 library. Notably, ncAA **23**, which is short and bears a branch directly after the carbamate,  
166 was not incorporated either. This indicates that at least one carbon atom located  
167 between the carbamate and a fluorinated branch is essential for the aminoacylation.

### 168 **Pocket-substrate relationship**

169 The heat map of the PyIRS variants was analyzed to determine the key residues in the  
170 binding pocket for the aminoacylation of the tested ncAAs **1–23**. The 20 incorporated  
171 ncAAs required diverse structural adaptations of the active site, due to the different steric  
172 demands and chemistries of their side chains (Figure 5). Y271 (P1) defined the bottom  
173 of the binding pocket in PyIRS; therefore, this position strongly varied with the ncAA  
174 size. While tyrosine was highly conserved at P1 for the short ncAAs **1, 2, 10, 11,** and **14**,  
175 alanine was favored by the larger ncAAs **4–7, 13, 15–17, 19,** and **20** in agreement with  
176 previous reports (9, 28). Aminoacylation of the longest ncAAs **8** and **21** was preferred by



177 a glycine at P1 of the active site. We observed a similar trend for the position L274 (P2),  
178 which constituted the rear end of the binding pocket. While leucine was favored by the  
179 small ncAAs **1**, **10**, and **11**, the shorter valine occurred in high abundance for larger  
180 ncAAs. Interestingly, the mutation C313V (P3), which was previously shown to  
181 significantly improve the aminoacylation of ncAAs (29), was strictly conserved  
182 throughout all sequenced variants. M315 (P4) differed widely among the small ncAAs.  
183 However, tyrosine was more abundant among the larger ncAAs **8**, **16**, **20**, and **21**. The  
184 positions V370 (P5) and I378 (P6) were not influenced by the size or chemistry of the  
185 incorporated ncAAs. Arginine and isoleucine appeared with the highest frequency  
186 among all sorted variants.

### 187 **Design of a promiscuous PylRS variant**

188 Orthogonal aaRS/tRNA pairs are usually engineered for a specific ncAA. In some cases,  
189 however, an aaRS/tRNA pair may aminoacylate up to 40 ncAAs with similar structural  
190 features (30). To design a promiscuous PylRS variant for the incorporation of large and  
191 bulky ncAAs, we determined potential key residues from the heat map (Figure 5). We  
192 combined the mutations Y271A, L274V, C313V, M315Y, Y349F, and V370R to yield a  
193 highly promiscuous PylRS (HpRS).

194 To test the substrate scope, the HpRS/tRNA<sup>Pyl</sup> pair and mTFP1<sub>TAG128</sub> were expressed  
195 with and without the four classes of ncAAs **1–35** (1 mM). The HpRS/tRNA<sup>Pyl</sup> pair worked  
196 orthogonally in *E. coli*; thus, the fluorescence signal of mTFP1<sub>TAG128</sub> was undetectable in  
197 the absence of ncAAs (Figure 6). In contrast, the presence of the ncAAs resulted in a  
198 significant fluorescent signal (Figure 6A-C). The incorporation of the ncAAs **1–8**, **10–21**,  
199 **24–26**, and **28–35** into mTFP1 was additionally confirmed by SDS-PAGE

200 (Supplementary Figure 2) and ESI-TOF (Supplementary Table 3). Remarkably, HpRS  
201 tolerated a broad range of lysine carbamates with diverse features, including aliphatic  
202 chains, fluorinated residues, cyclic structures, and the biotinylated ncAA **35**. In  
203 agreement with our assumption, HpRS was highly capable of aminoacylating ncAAs with  
204 long side chains **3-6** and gave only moderate results for the smallest tested ncAAs **1** and  
205 **10**.

206 To yield a PylRS variant particular suited for the aminoacylation of small ncAAs, we  
207 combined the mutations C313V and Y349F. To validate our heat-map-guided design,  
208 we expressed the PylRS variant (C313V, Y349F) together with tRNA<sup>Pyl</sup> and mTFP<sub>TAG128</sub>  
209 in the presence of the ncAAs **1**, **2**, **10**, **11**, and **14**. Indeed, this PylRS variant (C313V,  
210 Y349F) showed a significantly higher aminoacylation efficiency of the small ncAAs **1**, **10**,  
211 and **11** than HpRS (Figure 6D). The homology models provide further insights into the  
212 structural basis for the observed aminoacylation efficiency (Figure 7). Among the six  
213 mutations in HpRS, Y271A had the most pronounced effect on the shape of the binding  
214 pocket, opening up a large cavity at the bottom. L274V generated additional spaces.  
215 Overall, the binding pocket of HpRS appeared to be substantially different in terms of  
216 volume from the PylRS variant (C313V, Y349F).

217

## 218 **Discussion**

219 The engineering process of ncAA-specific aaRS/tRNA pairs is typically sophisticated  
220 and time consuming. In general, directed approaches begin with the composition of a  
221 large aaRS mutant library containing  $10^8$ – $10^9$  variants and a subsequent screening to  
222 identify the beneficial variants (31). Therefore, dead-and-alive assays on a selective

223 solid or liquid medium are the preferred method for screening the large quantities of  
224 variants in a short time as demonstrated on existing aaRS/tRNA pairs (2, 13).  
225 Nevertheless, this screening method suffers from a harsh selection pressure that is  
226 difficult to adjust, causing slow cell growth and low survival rates (17). Consequently,  
227 even beneficial variants might be unintentionally excluded from the library. Additionally,  
228 large libraries that likely exceed the transformation efficiency of expression strains, lead  
229 to less diversity.

230 In parallel, more focused libraries have shown to sustain a higher frequency of beneficial  
231 variants and to provide promising results in directed evolution (32). Unlike dead-and-  
232 alive assays, FACS provides a tunable sorting stringency over a broad dynamic range  
233 for the ncAA incorporation (16, 17, 33).

234 Our FACS-based screen takes advantage of the unique properties of the PyIRS,  
235 improving speed, sensitivity and selectivity. The position N311 was used as the selection  
236 filter instead of iterative rounds of negative and positive selections. The efficiency of our  
237 method resulted in a higher diversity of positive mutants that might have been rejected  
238 by classical assays. The possibility of a random mutation within the amber codon, which  
239 could cause a false positive signal, was reduced due to the smaller number of  
240 generations. We maintained the complexity of our mutant library during the FACS  
241 screen by using a conditioned medium, which improved the survival rate of the cells  
242 three-fold. With our setup, we could demonstrate that a relatively small PyIRS library,  
243 comprised of six positions ( $9.5 \times 10^4$  variants), and a single positive selection round of  
244 FACS were sufficient for identifying 110 orthogonal PyIRS variants that together  
245 incorporate 20 structurally diverse ncAAs (Supplementary Table 2).

246 Our newly established procedure enabled the prediction of the promiscuous PyIRS  
247 variant, HpRS, with a particular preference for larger ncAAs. HpRS accepts a broad  
248 range of ncAAs (31 out of 35) making this PyIRS a valuable tool for biotechnology with  
249 multiple applications and an ideal starting point for future mutant libraries. Furthermore,  
250 the site-directed incorporation of the biotinylated ncAA **35** into a protein of interest might  
251 be a popular starting point to simplify techniques such as Western blotting, ELISA, flow  
252 cytometry or antibody labeling kits.

253 In summary, we demonstrated the ability to rapidly identify beneficial PyIRS variants  
254 from a focused mutant library for the incorporation of a broad range of ncAAs. The high  
255 efficiency of our FACS-based screening method reduced the frequency of false positive  
256 signals and facilitated the analysis of the sequence space in the sorted PyIRS variants.  
257 Our approach enabled the identification of the promiscuous variant, HpRS. Hence, the  
258 prediction of PyIRS/tRNA<sup>Pyl</sup> pairs for ncAAs based on the pocket-substrate information  
259 can now be used as an example for others to avoid the cumbersome engineering  
260 process.

## 261 **Material and methods**

### 262 **Strains**

263 All cloning steps were performed in TOP10 *E. coli* (Thermo Fisher Scientific). The FACS  
264 and protein expression experiments were carried out with EXPRESS BL21(DE3)  
265 (Lucigen, Middleton, WI).

266

### 267 **Medium**

268 A conditioned medium was used to improve the survival of sorted cells after FACS. To  
269 prepare the conditioned medium, BL21 (DE3) cultures were grown in LB ( $OD_{600} \sim 1.0$ ),  
270 centrifuged at 8000 x g for 20 min at 4 °C and the supernatant was sterilized by passing  
271 through a 0.22  $\mu$ m cellulose filter (Millipore, Bedford, MA).

272

### 273 **Non-canonical amino acids (ncAA)**

274 ncAA **1** (Sigma-Aldrich), ncAA **15–17** (Sirius Fine Chemicals, Bremen, Germany), and  
275 ncAAs **24–27**, **30–33**, as well as **35** (SUNGYOUNG Chemical Limited, Shanghai, China)  
276 were purchased from commercial sources. ncAA **34** was synthesized according to the  
277 procedure published by Luo *et al.* (34). ncAA **2–14**, **18–23**, **28**, and **29** were synthesized  
278 according to a modified procedure from Li *et al.* (35) (Supplementary Information (S2)).

279

### 280 **Construction of pEVOL303**

281 The plasmid pEVOL303 was constructed by ligating the plasmid pEVOL (36) with the  
282 commercially available pET303/CT-His (Thermo Fisher Scientific) using Gibson cloning  
283 (37). Prior to ligation, pEVOL was digested with the restriction enzymes *SacI* and *PciI*.

284 The required region of pET303 was amplified using the primers pET303\_f and pET303\_r  
285 (Supplementary Table 1). The resulting plasmid, pEVOL303, carried a p15A origin, a  
286 chloramphenicol resistance gene, a *Methanosarcina barkeri* PyIRS gene downstream of  
287 a pBAD promoter, and the corresponding *tRNA* gene controlled by a proK promoter. The  
288 fluorescent protein gene with an N-terminal 6xHis-SUMO tag, either wild-type mTFP1 or  
289 mTFP1<sub>TAG128</sub> (bearing an amber codon at position 128), was cloned downstream of a T7  
290 promoter. The amber codon was inserted using the primers mTFP\_128\_f and  
291 mTFP\_128\_r (Supplementary Table 1).

292

### 293 **PyIRS library construction**

294 *Methanosarcina barkeri* PyIRS containing the single mutation Y349F served as the  
295 starting point for our mutant library. Six positions in PyIRS, Y271, L274, C313, M315,  
296 V370, and I378, were selected for our library based on a homology model derived from  
297 the crystal structure of PyIRS (PDB 4Q6G and 4CS3) (Figure 1A and B) (38, 39). A pre-  
298 defined set of amino acids was inserted into the six positions, resulting in 95,040  
299 mutants. To ensure an equal distribution of all the mutants, the library was assembled  
300 commercially by the company, Life Technologies (Thermo Fisher Scientific) and  
301 introduced to pEVOL303 *via* the restriction sites *Sall* and *BglII*. The resulting plasmid,  
302 pEVOL303\_Lib, was transformed into BL21 (DE3) cells applying the standard  
303 electroporation protocol. The transformation was determined with  $1 \times 10^7$  CFU per  
304 preparation.

305

### 306 **Sample preparation for FACS**

307 BL21 (DE3) cells transformed with pEVOL303\_Lib were inoculated in 50 mL LB  
308 medium supplemented with 25 µg/ml chloramphenicol (Cm), and grown until an OD<sub>600</sub> of  
309 0.7. Then, 450 µL of the cells was transferred into a 2 mL reaction vessel and induced  
310 with 50 µL induction medium (10 mM ncAA, 10 mM IPTG, 1% w/v arabinose) and  
311 incubated for 16 h at 37 °C and 700 rpm. The cells were diluted to a final concentration  
312 of 1x10<sup>7</sup> cell/mL and washed twice with an M9 minimal medium supplemented with 25  
313 µg/ml chloramphenicol. In the beginning of each FACS experiment, the negative control  
314 (cell growth in the absence of ncAA) was screened first to ensure the discrimination of  
315 canonical amino acids by the PylRS mutant library. Cell sorting was performed by  
316 detecting the fluorescence of mTFP1 with a BD Influx (BD Biosciences) operated with  
317 filter-sterilized BD FACS Flow Sheath Fluid, a 457 nm laser for excitation, and a 480/40  
318 bandpass filter. The selected operation mode was 1.0 Drop Single. The selection  
319 threshold (gate) was adjusted based on the fluorescent signal from the first 1x10<sup>5</sup> cells  
320 of each sample. The fluorescence and side scatter of 1x10<sup>7</sup> cells were monitored. Cells  
321 within the gate were sorted separately on a 96-well plate (Sigma-Aldrich) supplied with  
322 the conditioned medium containing 25 µg/ml chloramphenicol. The growth of the sorted  
323 cells was continued overnight at 37 °C and 300 rpm. Each culture was sequenced using  
324 the primers Lib\_seq\_f and Lib\_seq\_r (Supplementary Table 1). pEVOL303\_Lib  
325 containing the sequenced PylRS variants were retransformed into new BL21 (DE3)  
326 cells, grown and induced with the induction medium at OD<sub>600</sub> of 0.7. Correspondingly,  
327 PylRS, tRNA<sup>Pyl</sup>, and mTFP1<sub>TAG128</sub> were expressed. Both the incorporation of the ncAAs  
328 and the orthogonality of the PylRS variant were confirmed by fluorescence  
329 measurement of mTFP1 (excitation 462 nm, emission 492 nm) in a black, 96-well plate

330 (Thermo Fisher Scientific) with an Infinite M1000 plate reader (Tecan, Zurich,  
331 Switzerland).

332

### 333 **ncAA incorporation by HpRS and Variant (C313V and Y349F)**

334 A single BL21 (DE3) colony containing pEVOL303 encoding for HpRS or PylRS (C313V  
335 and Y349F) was selected from the LB/Cm agar plate and inoculated into 50 mL LB/Cm  
336 media, then incubated and shaken overnight at 37 °C. The resulting culture was diluted  
337 (1:100) with fresh LB/Cam media and grown to an OD<sub>600</sub> of 1.5. The mTFP1 expression  
338 was triggered by adding 1 mM ncAA, 1 mM IPTG, and 0.1% w/v arabinose and cell  
339 growth continued at 37 °C and 700 rpm for 16 h. Fluorescence was measured  
340 correspondingly. In the end, the sample was heated at 75 °C for 20 min and centrifuged  
341 at 20,000 x g for 15 min. The supernatant was analyzed by SDS-PAGE.

342

### 343 **Mass spectrometry**

344 Harvested *E. coli* BL21 (DE3) cells were washed with phosphate-buffered saline (PBS).  
345 The cell pellet was suspended in lysis buffer (100 mM Tris pH 7.5, 500 mM NaCl, 20 mM  
346 imidazole, 10%, v/v glycerol) and incubated at 75 °C for 20 min. Cell debris was  
347 removed by centrifugation (60,000 x g, 30 min at 4 °C). The supernatant was loaded  
348 onto a HisTrap HP Ni-NTA column (GE Healthcare), pre-equilibrated with lysis buffer.  
349 The mTFP1 was eluted by increasing the concentration of imidazole from 20 mM to 500  
350 mM in the lysis buffer over 10 column volumes. SUMO protease was added to the eluted  
351 protein, dialyzed overnight at 4 °C against ddH<sub>2</sub>O and passed through a HisTrap HP Ni-  
352 NTA to remove the remaining N-terminal 6xHis as well as the SUMO tag. Then mTFP1



353 was incubated at 75 °C for 10 min, centrifuged at 60,000 x g for 30 min at 4 °C and  
354 analyzed by mass spectrometry (maXis HD™ ESI-TOF, Bruker) at a concentration of  
355 0,04 mM. The sample was injected into a high-performance liquid chromatography  
356 (Agilent Technologies, C4 column, column volume of 5 mL) and separation was  
357 performed at a constant flow rate of 0.5 µL/min and a gradient of 80% acetonitrile and  
358 0.1% formic acid for 8 min. Fractions were recorded according to the standard  
359 procedure.

360

### 361 **Homology model of the *Methanosarcina barkeri* PyIRS in complex with** 362 **pyrrolysine**

363 Homology models were generated using the YASARA Structure, Version 14.7.17 (40).  
364 The catalytic domain of *Methanosarcina barkeri* PyIRS served as the template for  
365 YASARA's homology modeling macro, using the conservative "slow" protocol with the  
366 following parameter settings: number of PSI-BLAST iterations – 10; maximum allowed  
367 BLAST E-value to consider template – 0.5; maximum oligomerization state – 2;  
368 maximum number of alignment variations per template – 4; maximum number of  
369 conformations tried per loop – 200; and maximum number of residues added to the  
370 termini – 20. The resulting homology model was based on two structures of PyIRS  
371 variants, PDB 4Q6G and 4CS3; both sequences had a 98% homology with the template  
372 (38, 39). The YASARA algorithm performed the secondary structure prediction, loop  
373 construction, and amino-acid rotamer selection, followed by a steepest-descent energy  
374 minimization.

375

376 **Model of *Methanosarcina barkeri* PyIRS mutants in complex with ncAAs**

377 To create HpRS and PyIRS (C313V, Y349F), mutations were introduced to the PyIRS  
378 homology model. Next, the bound pyrrolysine ligand was converted into the designated  
379 ncAA *in silico*. Subsequently, all of the residues in the model, except for the mutation  
380 sites and the ncAA side chain, were frozen for a molecular-dynamics simulation (50 ps,  
381 T = 300 K) with YASARA's recommended default force field, AMBER 2003 (41).  
382 Eventually, the energy of the free residues was repeatedly minimized with the AMBER  
383 2003 force field until overlays with the previous model did not reveal any significant  
384 changes in the orientation of the respective side chains.

385

## 386 **Acknowledgements**

387 The research reported in this publication was supported by funding from King Abdullah  
388 University of Science and Technology (KAUST). We thank the SFB749/A10 (M.G.) for  
389 financial support. We are grateful to Prof. Peter G. Schultz (The Scripps Research  
390 Institute, La Jolla, CA) for kindly providing the original pEVOL-PyIRS plasmid.

391

## 392 **Author contributions**

393 J. E., M. G., M. R. designed and supervised the research project; A. H., D. R. and A. A.  
394 performed the molecular biology; A. H. and A. D. conducted the FACS experiments; X.  
395 L. and S. G. synthesized the ncAAs; J. E., A. A., R. K., M. R., and A. H. analyzed the  
396 data and wrote the manuscript.

397

## 398 **Competing financial interest statement**

399 The authors declare no competing financial interest.

400

401

## 402 **References**

- 403 1. Dumas A, Lercher L, Spicer CD, & Davis BG (2015) Designing logical codon  
404 reassignment - Expanding the chemistry in biology. *Chemical Science* 6(1):50-69.
- 405 2. Liu CC & Schultz PG (2010) Adding New Chemistries to the Genetic Code.  
406 *Annual Review of Biochemistry, Vol 79* 79:413-444.
- 407 3. Lang K, *et al.* (2012) Genetic Encoding of Bicyclononynes and trans-  
408 Cyclooctenes for Site-Specific Protein Labeling in Vitro and in Live Mammalian  
409 Cells via Rapid Fluorogenic Diels-Alder Reactions. *Journal of the American*  
410 *Chemical Society* 134(25):10317-10320.
- 411 4. Plass T, *et al.* (2012) Amino Acids for Diels-Alder Reactions in Living Cells.  
412 *Angew Chem Int Edit* 51(17):4166-4170.
- 413 5. Neumann H, Peak-Chew SY, & Chin JW (2008) Genetically encoding N-epsilon-  
414 acetyllysine in recombinant proteins. *Nature Chemical Biology* 4(4):232-234.

- 415 6. Wang L, Brock A, Herberich B, & Schultz PG (2001) Expanding the genetic code  
416 of *Escherichia coli*. *Science* 292(5516):498-500.
- 417 7. Fekner T & Chan MK (2011) The pyrrolysine translational machinery as a  
418 genetic-code expansion tool. *Current Opinion in Chemical Biology* 15(3):387-391.
- 419 8. Wan W, Tharp JM, & Liu WR (2014) Pyrrolysyl-tRNA synthetase: An ordinary  
420 enzyme but an outstanding genetic code expansion tool. *Biochimica Et*  
421 *Biophysica Acta-Proteins and Proteomics* 1844(6):1059-1070.
- 422 9. Yanagisawa T, *et al.* (2008) Multistep Engineering of Pyrrolysyl-tRNA Synthetase  
423 to Genetically Encode N $\epsilon$ -(*o*-Azidobenzoyloxycarbonyl) lysine for Site-Specific  
424 Protein Modification. *Chemistry & Biology* 15(11):1187-1197.
- 425 10. Polycarpo CR, *et al.* (2006) Pyrrolysine analogues as substrates for pyrrolysyl-  
426 tRNA synthetase. *Febs Letters* 580(28-29):6695-6700.
- 427 11. Hancock SM, Uprety R, Deiters A, & Chin JW (2010) Expanding the Genetic  
428 Code of Yeast for Incorporation of Diverse Unnatural Amino Acids via a  
429 Pyrrolysyl-tRNA Synthetase/tRNA Pair. *Journal of the American Chemical Society*  
430 132(42):14819-14824.
- 431 12. Xie JM & Schultz PG (2006) Innovation: A chemical toolkit for proteins - an  
432 expanded genetic code. *Nat Rev Mol Cell Bio* 7(10):775-782.
- 433 13. Voloshchuk N & Montclare JK (2010) Incorporation of unnatural amino acids for  
434 synthetic biology. *Molecular Biosystems* 6(1):65-80.
- 435 14. Wang L, Zhang ZW, Brock A, & Schultz PG (2003) Addition of the keto functional  
436 group to the genetic code of *Escherichia coli*. *Proceedings of the National*  
437 *Academy of Sciences of the United States of America* 100(1):56-61.
- 438 15. Owens AE, Grasso KT, Ziegler CA, & Fasan R (2017) Two-Tier Screening  
439 Platform for Directed Evolution of Aminoacyl-tRNA Synthetases with Enhanced  
440 Stop Codon Suppression Efficiency. *Chembiochem* 18(12):1109-1116.
- 441 16. Santoro SW, Wang L, Herberich B, King DS, & Schultz PG (2002) An efficient  
442 system for the evolution of aminoacyl-tRNA synthetase specificity. *Nature*  
443 *biotechnology* 20(10):1044-1048.
- 444 17. Kuhn SM, Rubini M, Fuhrmann M, Theobald I, & Skerra A (2010) Engineering of  
445 an Orthogonal Aminoacyl-tRNA Synthetase for Efficient Incorporation of the Non-  
446 natural Amino Acid *O*-Methyl-L-tyrosine using Fluorescence-based Bacterial Cell  
447 Sorting. *Journal of Molecular Biology* 404(1):70-87.
- 448 18. Link AJ, *et al.* (2006) Discovery of aminoacyl-tRNA synthetase activity through  
449 cell-surface display of noncanonical amino acids. *Proceedings of the National*  
450 *Academy of Sciences of the United States of America* 103(27):10180-10185.
- 451 19. Packer MS & Liu DR (2015) Methods for the directed evolution of proteins. *Nature*  
452 *reviews. Genetics* 16(7):379-394.
- 453 20. Wang YS, *et al.* (2011) The de novo engineering of pyrrolysyl-tRNA synthetase  
454 for genetic incorporation of L-phenylalanine and its derivatives. *Molecular*  
455 *Biosystems* 7(3):714-717.
- 456 21. Kavran JM, *et al.* (2007) Structure of pyrrolysyl-tRNA synthetase, an archaeal  
457 enzyme for genetic code innovation. *Proceedings of the National Academy of*  
458 *Sciences of the United States of America* 104(27):11268-11273.
- 459 22. Schneider S, *et al.* (2013) Structural Insights into Incorporation of Norbornene  
460 Amino Acids for Click Modification of Proteins. *Chembiochem* 14(16):2114-2118.
- 461 23. Firth AE & Patrick WM (2005) Statistics of protein library construction.  
462 *Bioinformatics* 21(15):3314-3315.

- 463 24. Ai HW, Henderson JN, Remington SJ, & Campbell RE (2006) Directed evolution  
464 of a monomeric, bright and photostable version of Clavularia cyan fluorescent  
465 protein: structural characterization and applications in fluorescence imaging.  
466 *Biochemical Journal* 400(Pt 3):531-540.
- 467 25. Nikić I, *et al.* (2014) Minimal Tags for Rapid Dual - Color Live - Cell Labeling and  
468 Super - Resolution Microscopy. *Angewandte Chemie International Edition*  
469 53(8):2245-2249.
- 470 26. Lang K & Chin JW (2014) Cellular incorporation of unnatural amino acids and  
471 bioorthogonal labeling of proteins. *Chem Rev* 114(9):4764-4806.
- 472 27. Muller K, Faeh C, & Diederich F (2007) Fluorine in pharmaceuticals: Looking  
473 beyond intuition. *Science* 317(5846):1881-1886.
- 474 28. Schmidt MJ, Borbas J, Drescher M, & Summerer D (2014) A Genetically Encoded  
475 Spin Label for Electron Paramagnetic Resonance Distance Measurements.  
476 *Journal of the American Chemical Society* 136(4):1238-1241.
- 477 29. Nguyen DP, Elliott T, Holt M, Muir TW, & Chin JW (2011) Genetically Encoded  
478 1,2-Aminothiols Facilitate Rapid and Site-Specific Protein Labeling via a Bio-  
479 orthogonal Cyanobenzothiazole Condensation. *Journal of the American Chemical*  
480 *Society* 133(30):11418-11421.
- 481 30. Miyake-Stoner SJ, *et al.* (2010) Generating Permissive Site-Specific Unnatural  
482 Aminoacyl-tRNA Synthetases. *Biochemistry* 49(8):1667-1677.
- 483 31. Takimoto JK, Dellas N, Noel JP, & Wang L (2011) Stereochemical basis for  
484 engineered pyrrolysyl-tRNA synthetase and the efficient in vivo incorporation of  
485 structurally divergent non-native amino acids. *ACS Chem Biol* 6(7):733-743.
- 486 32. Reetz MT, Kahakeaw D, & Lohmer R (2008) Addressing the numbers problem in  
487 directed evolution. *ChemBiochem* 9(11):1797-1804.
- 488 33. Yoo TH & Tirrell DA (2007) High-throughput screening for Methionyl-tRNA  
489 synthetases that enable residue-specific incorporation of noncanonical amino  
490 acids into recombinant proteins in bacterial cells. *Angew Chem Int Edit*  
491 46(28):5340-5343.
- 492 34. Luo J, *et al.* (2014) Genetically Encoded Optochemical Probes for Simultaneous  
493 Fluorescence Reporting and Light Activation of Protein Function with Two-Photon  
494 Excitation. *Journal of the American Chemical Society* 136(44):15551-15558.
- 495 35. Li H, Chen C-y, & Balsells Padros J (2011) Highly Efficient Carbamate Formation  
496 from Alcohols and Hindered Amino Acids or Esters Using N,N'-Disuccinimidyl  
497 Carbonate (DSC). *Synlett* 2011(10):1454-1458.
- 498 36. Young TS, Ahmad I, Yin JA, & Schultz PG (2010) An Enhanced System for  
499 Unnatural Amino Acid Mutagenesis in *E. coli*. *Journal of Molecular Biology*  
500 395(2):361-374.
- 501 37. Gibson DG, *et al.* (2009) Enzymatic assembly of DNA molecules up to several  
502 hundred kilobases. *Nature methods* 6(5):343-U341.
- 503 38. Guo LT, *et al.* (2014) Polyspecific pyrrolysyl-tRNA synthetases from directed  
504 evolution. *Proceedings of the National Academy of Sciences of the United States*  
505 *of America* 111(47):16724-16729.
- 506 39. Schmidt MJ, Weber A, Pott M, Welte W, & Summerer D (2014) Structural Basis of  
507 Furan-Amino Acid Recognition by a Polyspecific Aminoacyl-tRNA-Synthetase and  
508 its Genetic Encoding in Human Cells. *ChemBiochem* 15(12):1755-1760.

- 509 40. Krieger E & Vriend G (2015) New ways to boost molecular dynamics simulations.  
510 *Journal of computational chemistry* 36(13):996-1007.  
511 41. Duan Y, *et al.* (2003) A point-charge force field for molecular mechanics  
512 simulations of proteins based on condensed-phase quantum mechanical  
513 calculations. *Journal of computational chemistry* 24(16):1999-2012.  
514

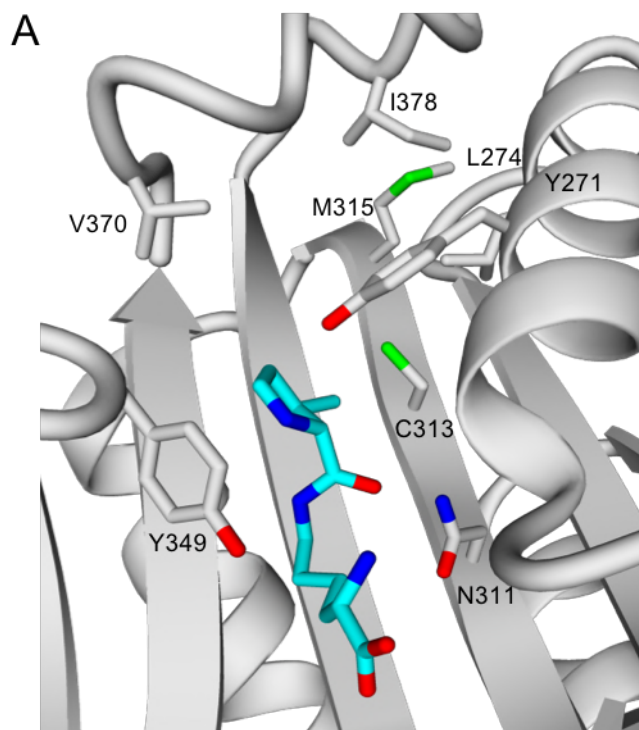

**B**

| Position | Amino acids                        |
|----------|------------------------------------|
| P1: Y271 | G, A, L, M, C, Y                   |
| P2: L274 | G, A, V, I, L, M, C, S, T, N, D    |
| P3: C313 | G, A, V, C                         |
| P4: M315 | G, A, V, I, L, M, C, S, T, N, Y, D |
| P5: V370 | V, K, R                            |
| P6: I378 | G, A, V, I, M, C, S, T, N, D       |

Library size: 95 040

**Figure 1.** Design of *Methanosarcina barkeri* PyIRS mutant library. (A) Homology model of PyIRS in complex with pyrrolysine (cyan) in the binding pocket. (B) Mutation scheme of the performed mutant library. The mutation Y349F was included in the mutant library by default.



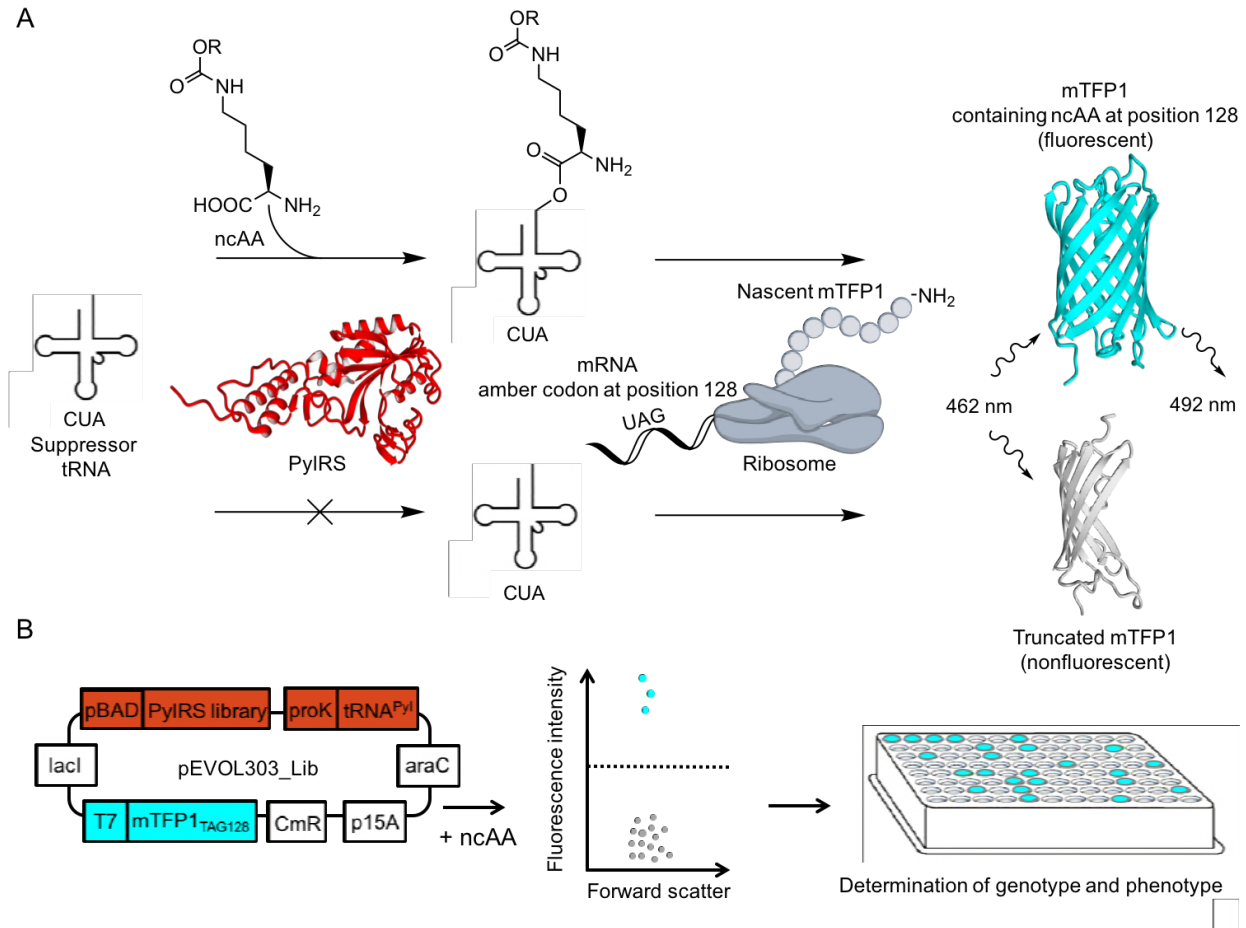

**Figure 2.** FACS-based screen of ncAA incorporation. (A) Suppression of the amber codon at position 128 in mTFP1 by a charged tRNA<sup>Pyl</sup> results in a fluorescent product (ex. 462 nm, em. 492 nm). Rejection of an ncAA by PylRS leads to a truncated, nonfluorescent product. (B) Cells transformed with the plasmid pEVOL303\_Lib are screened for ncAA incorporation by mTFP1-based fluorescence intensity and forward scatter using FACS. Fluorescent cells (cyan) exceeding a set threshold are sorted separately from nonfluorescent cells (grey) for sequencing on a 96-well plate. pEVOL303\_Lib encodes for the PylRS library, tRNA<sup>Pyl</sup> and mTFP1<sub>TAG128</sub>. p15A origin of replication (p15A), *araC* repressor gene (*araC*), chloramphenicol acetyltransferase marker (*CmR*), *lac* repressor (*lacI*), T7 promoter (T7), *proK* promoter (*proK*), *araBAD* promoter (*pBAD*).



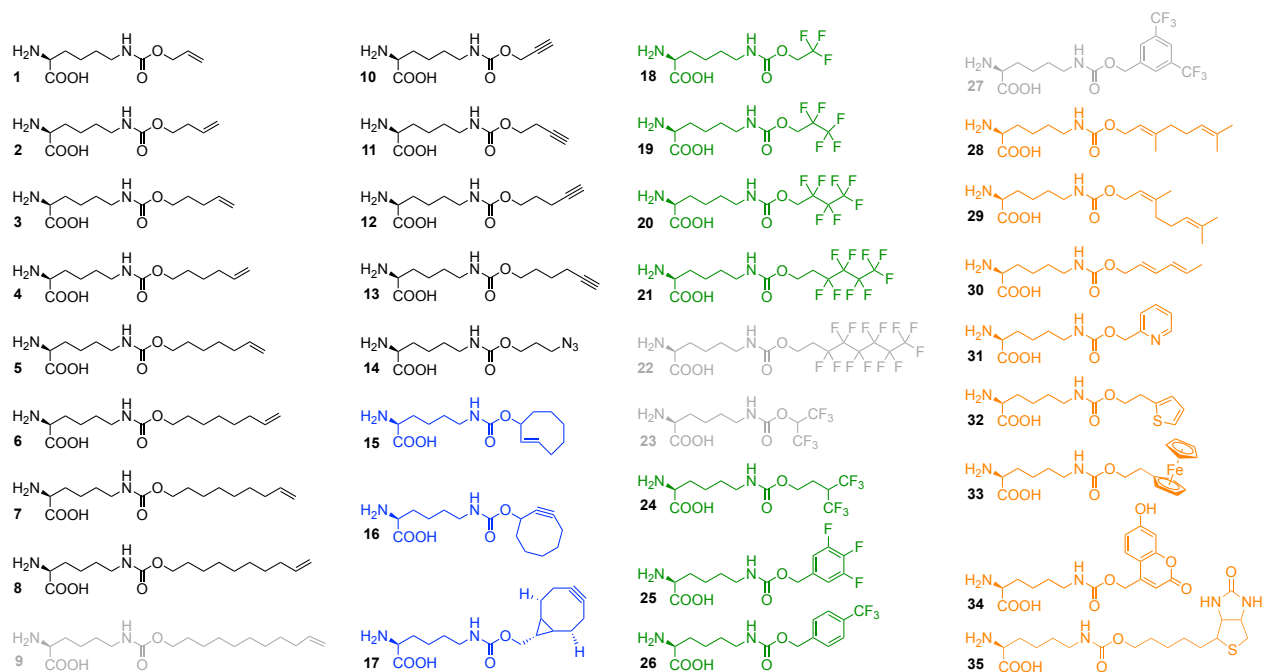

**Figure 3.** Chemical structures of analyzed ncAAs. Class I: linear alkenes, alkynes, and azide (black). Class II: cyclic alkenes and alkynes (blue). Class III: fluorinated side chains (green). Class IV: diverse functionalities (orange). Grey ncAA structures were rejected.

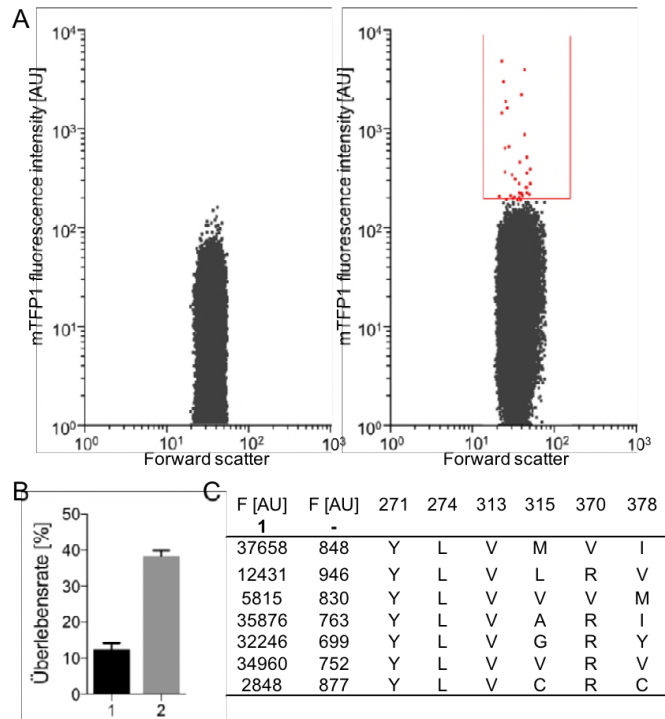

**Figure 4.** Identification of PyIRS variants for the incorporation of ncAA **1**. (A) (Left plot) *E. coli* cells harboring pEVOL303\_Lib were grown in the absence of ncAA and analyzed by FACS. Fluorescence intensity in arbitrary units (AU) and forward scatter of each cell were monitored. (Right plot) Cells harboring pEVOL303\_Lib were grown in the presence of ncAA **1**. Fluorescent cells (red) within the sort gate (red line) were separated from nonfluorescent cells. (B) Survival rate of cells after FACS in LB medium (1) and conditioned medium (2). Results were obtained from five independent experiments; standard deviation is indicated by error bars. (C) Fluorescence intensities of mTFP1<sub>TAG128</sub> with **1** and in the absence of ncAA (–) are depicted for seven PyIRS variants; the six positions in the mutant library are shown.

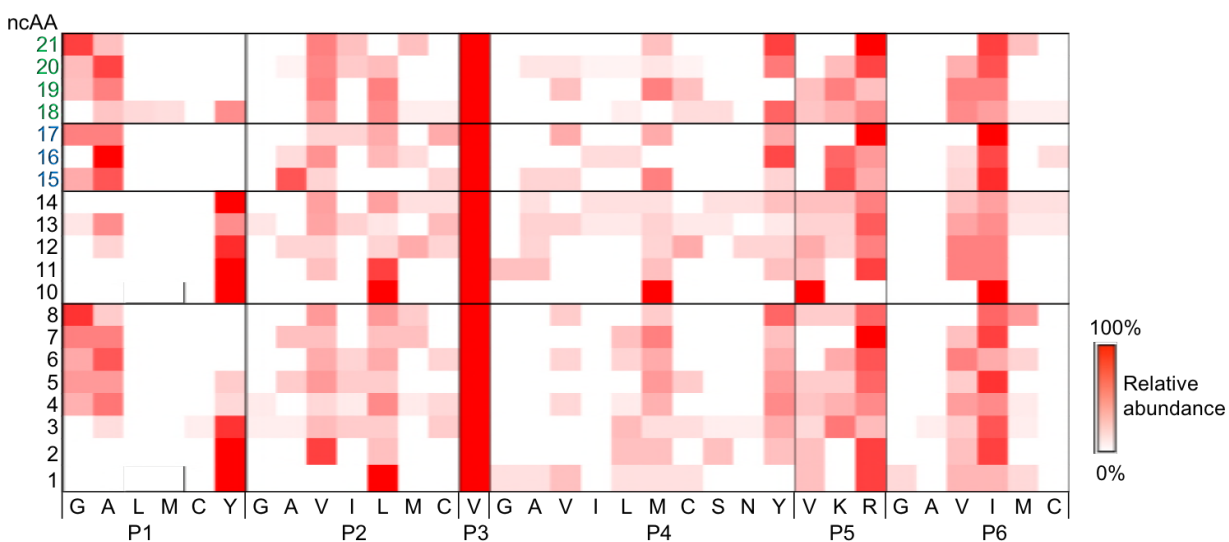

**Figure 5.** Heat map of the analyzed ncAAs **1-23** versus the six variable positions of the PyIRS library (P1=Y271, P2=L274, P3=C313, P4=M315, P5=V370, P6=I378). Amino acids are represented by a one-letter code; the color intensity indicates the relative abundance of a mutation (white: 0%; red: 100%). Modifications not present in any of the sequenced PyIRS variants are omitted. The incorporation of ncAAs **9**, **22**, and **23** was not detected.

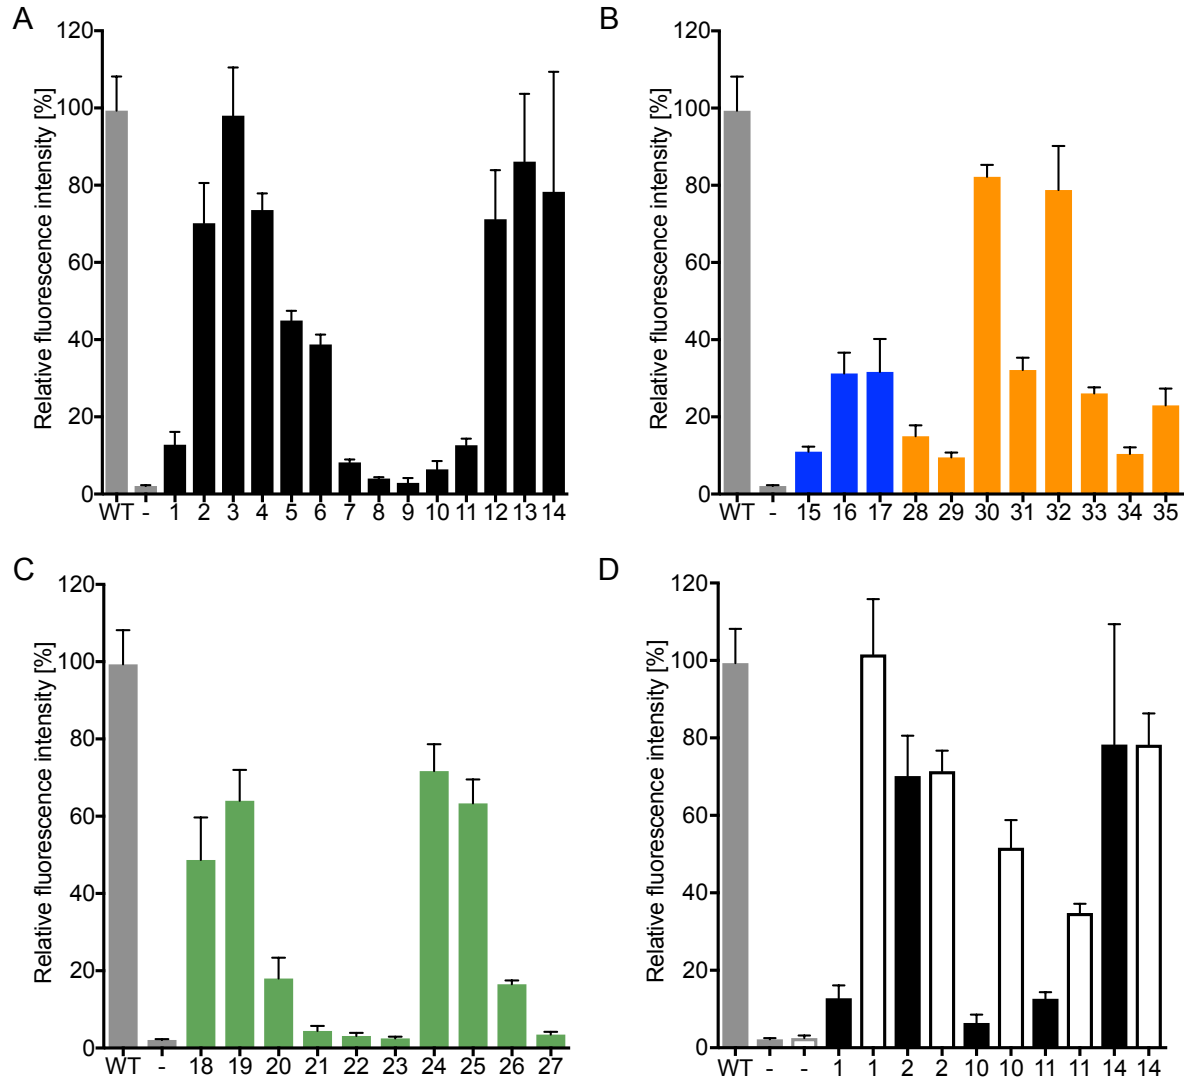

**Figure 6.** HpRS-dependent incorporation of ncAAs 1–35 in mTFP1<sub>TAG128</sub>. Fluorescence intensity of mTFP1 is normalized against wild-type (WT) mTFP1 (grey bar), while expression of mTFP1<sub>TAG128</sub> in the absence of ncAAs (-, grey bar) served as a negative control. Error bars indicate the standard deviation of three independent experiments. (A) Substrate profiles of HpRS for class I (black): ncAAs 1–14. (B) Class II (blue): ncAAs 15–17 and class IV (orange): ncAAs 28–35. (C) Class III (green): ncAAs 18–27. (D) Comparison of the aminoacylation efficiencies of HpRS (solid) and the PyIRS variant (C313V, Y349F) (no fill) for ncAAs 1, 2, 10, 11, and 14.

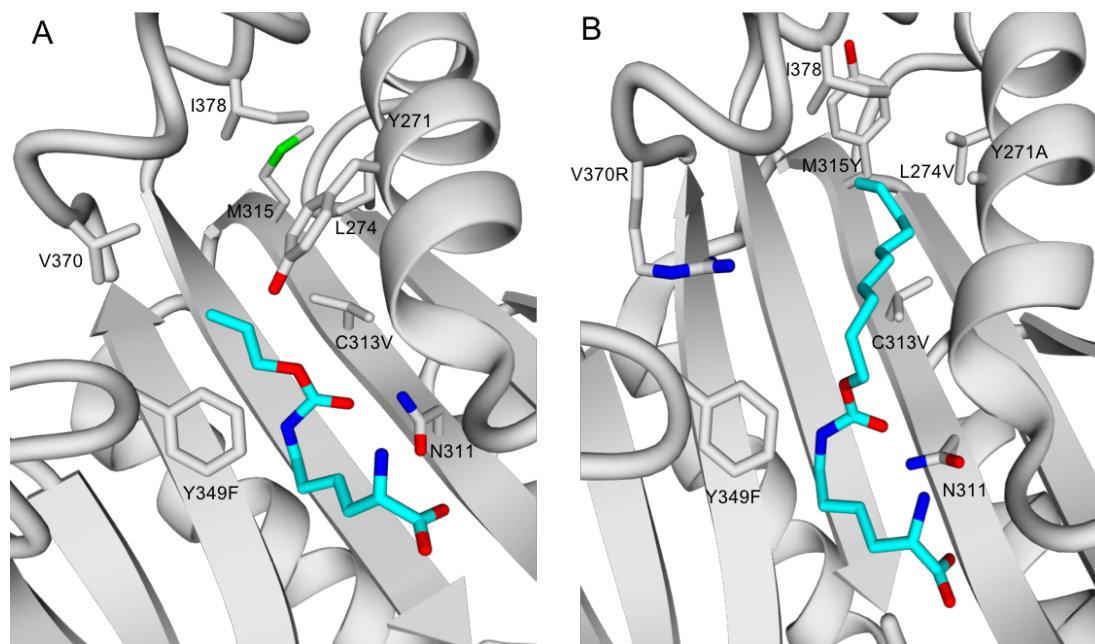

**Figure 7.** Comparison between the active sites in the PyIRS variant (C313V, Y349F) and HpRS. (A) Homology model of the *M. barkeri* PyIRS variant (C313V, Y349F) in complex with the ncAA **1** (cyan). (B) Homology model of the *M. barkeri* HpRS in complex with the ncAA **21** (cyan).

# **Engineering a promiscuous pyrrolysyl-tRNA synthetase by a high throughput FACS screen**

**Adrian Hohl<sup>1,3</sup>, Ram Karan<sup>1</sup>, Anastassja Akal<sup>1</sup>, Dominik Renn<sup>1</sup>, Xuechao Liu<sup>1</sup>,  
Alaguraj Dharmarajnadar<sup>1</sup>, Seema Ghorpade<sup>1,2</sup>, Michael Groll<sup>3</sup>, Magnus Rueping<sup>1\*</sup>,  
Jörg Eppinger<sup>1\*</sup>**

<sup>1</sup> King Abdullah University of Science and Technology (KAUST), KAUST Catalysis Center (KCC), Physical Sciences and Engineering Division (PSE), Thuwal, 23955-6900, Saudi Arabia

<sup>2</sup> Department of Dyestuff Technology, Institute of Chemical Technology, Matunga, Mumbai, India 400019

<sup>3</sup> Technical University of Munich, Center for Integrated Protein Science Munich in the Department Chemistry, Garching, Germany

The authors declare no conflict of interest.

\*For correspondence: [magnus.rueping@kaust.edu.sa](mailto:magnus.rueping@kaust.edu.sa), [jorg.eppinger@kaust.edu.sa](mailto:jorg.eppinger@kaust.edu.sa)

## S1. Additional Tables and Figures

**Supplementary Table 1.** List of oligomers used in this study. Amber codon is highlighted yellow. Underscored sequence encodes the 6xHis-Sumo tag.

| Description | Sequence (5'-3')                                                                                                                                                                                                                                                                                                                                                                                                                                                                                                                                                                                                                                                                                                                                                                                                                                                                                                                                                                                                                                                                                                                                                                                                                                                                                                       |
|-------------|------------------------------------------------------------------------------------------------------------------------------------------------------------------------------------------------------------------------------------------------------------------------------------------------------------------------------------------------------------------------------------------------------------------------------------------------------------------------------------------------------------------------------------------------------------------------------------------------------------------------------------------------------------------------------------------------------------------------------------------------------------------------------------------------------------------------------------------------------------------------------------------------------------------------------------------------------------------------------------------------------------------------------------------------------------------------------------------------------------------------------------------------------------------------------------------------------------------------------------------------------------------------------------------------------------------------|
| pET303_f    | GAAAGGCTCAGTCGAAAGACTGGGCCTTGTTTGTGAGCTTAGTCATG<br>CCCCGCGCC                                                                                                                                                                                                                                                                                                                                                                                                                                                                                                                                                                                                                                                                                                                                                                                                                                                                                                                                                                                                                                                                                                                                                                                                                                                           |
| pET303_r    | CGGTCACACTGCTTCCGGTAGTCAATAAACCGGTGCTCATCAGCAA<br>AAACCCCTCAAGACC                                                                                                                                                                                                                                                                                                                                                                                                                                                                                                                                                                                                                                                                                                                                                                                                                                                                                                                                                                                                                                                                                                                                                                                                                                                      |
| Lib_seq_f   | AGATCTATGGACAAAAAACCGCTG                                                                                                                                                                                                                                                                                                                                                                                                                                                                                                                                                                                                                                                                                                                                                                                                                                                                                                                                                                                                                                                                                                                                                                                                                                                                                               |
| Lib_seq_r   | GTCGACTTACAGGTTGGTAG                                                                                                                                                                                                                                                                                                                                                                                                                                                                                                                                                                                                                                                                                                                                                                                                                                                                                                                                                                                                                                                                                                                                                                                                                                                                                                   |
| mTFP_128_f  | CGAGAACTTCCCCCCTAGGGCCCCGTG                                                                                                                                                                                                                                                                                                                                                                                                                                                                                                                                                                                                                                                                                                                                                                                                                                                                                                                                                                                                                                                                                                                                                                                                                                                                                            |
| mTFP_128_r  | CACGGGGCCCTAGGGGGGAAGTTCTCG                                                                                                                                                                                                                                                                                                                                                                                                                                                                                                                                                                                                                                                                                                                                                                                                                                                                                                                                                                                                                                                                                                                                                                                                                                                                                            |
| mTFP1_128   | <u>ATGGGCAGCAGCCATCATCATCATCACAGCAGCGGCCTGGTGC</u><br><u>CGCGCGGCAGCCATATGTCGGACTCAGAAGTCAATCAAGAAGCTAA</u><br><u>GCCAGAGGTCAAGCCAGAAGTCAAGCCTGAGACTCACATCAATTTAA</u><br><u>AGGTGTCCGATGGATCTTCAGAGATCTTCTTCAAGATCAAAAAGACC</u><br><u>ACTCCTTTAAGAAGGCTGATGGAAGCGTTCGCTAAAAGACAGGGTAA</u><br><u>GGAAATGGACTCCTTAAGATTCTTGTACGACGGTATTAGAATTCAAG</u><br><u>CTGATCAGACCCCTGAAGATTTGGACATGGAGGATAACGATATTATT</u><br><u>GAGGCTCACAGAGAACAGATTGGTGGATCCGGCGTAATCAAGCCCG</u><br><u>ACATGAAGATCAAGCTGAAGATGGAGGGCAACGTGAATGGCTATGC</u><br><u>CTTCGTGATCGAGGGCGAGGGCGAGGGCAAGCCCTACGACGGCAC</u><br><u>CAACACCATCAACCTGGAGGTGAAGGAGGGAGCCCCCCTGCCCTTC</u><br><u>TCCTACGACATTCTGACCACCGCTTCGCCTACGGCAACAGGGCCT</u><br><u>TCACCAAGTACCCCGACGACATCCCAACTACTTCAAGCAGTCCTTC</u><br><u>CCCGAGGGCTACTCTTGGGAGCGCACCATGACCTTCGAGGACAAGG</u><br><u>GCATCGTGAAGGTGAAGTCCGACATCTCCCTGGAGGAGGACTCCTT</u><br><u>CATCTACGAGATATATCTCAAGGGCGAGAACTTCCCCCCC</u> <b>TAG</b> <u>GGC</u><br><u>CCCGTGATGCAGAAGAAGACCACCGGCTGGGACGCCTCCACCGAG</u><br><u>AGGATGTACGTGCGCGACGGCGTGCTGAAGGGCGACGTCAAGCAC</u><br><u>AAGCTGCTGCTGGAGGGCGGCGGCTATTATCGCGTTGACTTCAAGA</u><br><u>CCATCTACAGGGCCAAGAAGGCGGTGAAGCTGCCCGACTATCACTT</u><br><u>TGTGGACCACCGCATCGAGATCCTGAACTATGACAAGGACTACAACA</u><br><u>AGGTGACCGTTTACGAGAGCGCCGTGGCCCGCAACTCCACCGACTA</u><br>A |

**Supplementary Table 2.** List of 110 unique PylRS variants and their corresponding substrate scopes with respect to the ncAAs. A total of 151 PylRS variants were sequenced. Only the six positions in PylRS that were included in the mutation library are depicted. The normalized fluorescence intensity of mTFP1<sub>TAG128</sub> (F [%]) co-expressed with a PylRS/tRNA<sup>Pyl</sup> pair, is listed both with (+) and without (-) ncAAs (1 mM). Fluorescence intensity was normalized against wild-type mTFP1. PylRS variants were not detected for ncAAs **9**, **22**, or **23**.

| Variant | Position  |           |           |           |           |           | ncAA | F [%] + | F [%] - |
|---------|-----------|-----------|-----------|-----------|-----------|-----------|------|---------|---------|
|         | P1<br>271 | P2<br>274 | P3<br>313 | P4<br>315 | P5<br>370 | P6<br>378 |      |         |         |
| 1       | Y         | L         | V         | M         | V         | I         | 1    | 94      | 2       |
|         |           |           |           |           |           |           | 4    | 33      | 2       |
|         |           |           |           |           |           |           | 10   | 48      | 1       |
|         |           |           |           |           |           |           | 12   | 35      | 2       |
|         |           |           |           |           |           |           | 13   | 23      | 2       |
|         |           |           |           |           |           |           | 14   | 87      | 1       |
| 2       | Y         | L         | V         | L         | R         | V         | 1    | 31      | 2       |
| 3       | Y         | L         | V         | V         | V         | M         | 1    | 15      | 2       |
| 4       | Y         | L         | V         | A         | R         | I         | 1    | 90      | 2       |
| 5       | Y         | L         | V         | G         | R         | Y         | 1    | 81      | 2       |
| 6       | Y         | L         | V         | V         | R         | V         | 1    | 87      | 2       |
| 7       | Y         | L         | V         | C         | R         | C         | 1    | 7       | 2       |
| 8       | Y         | V         | V         | S         | R         | I         | 2    | 32      | 2       |
| 9       | Y         | V         | V         | L         | R         | V         | 2    | 27      | 1       |
| 10      | Y         | V         | V         | M         | V         | I         | 2    | 68      | 1       |
| 11      | Y         | V         | V         | Y         | R         | I         | 2    | 32      | 1       |
|         |           |           |           |           |           |           | 11   | 90      | 2       |
| 12      | Y         | A         | V         | N         | K         | A         | 3    | 3       | 2       |
| 13      | C         | L         | V         | L         | R         | I         | 3    | 11      | 2       |
| 14      | Y         | V         | V         | S         | K         | I         | 3    | 45      | 2       |
| 15      | Y         | I         | V         | L         | K         | I         | 3    | 42      | 2       |
| 16      | Y         | C         | V         | C         | K         | V         | 3    | 75      | 2       |
| 17      | A         | L         | V         | Y         | K         | M         | 3    | 22      | 2       |
|         |           |           |           |           |           |           | 18   | 45      | 2       |
| 18      | Y         | C         | V         | L         | K         | I         | 3    | 75      | 2       |
| 19      | Y         | V         | V         | Y         | K         | I         | 3    | 68      | 2       |
| 20      | Y         | G         | V         | Y         | R         | V         | 3    | 27      | 2       |
| 21      | Y         | V         | V         | M         | R         | I         | 3    | 71      | 2       |
| 22      | A         | C         | V         | L         | V         | I         | 3    | 26      | 2       |
| 23      | Y         | I         | V         | Y         | K         | I         | 3    | 70      | 2       |
| 24      | Y         | I         | V         | Y         | V         | I         | 3    | 78      | 2       |



|    |   |   |   |   |   |   |    |     |   |
|----|---|---|---|---|---|---|----|-----|---|
| 25 | Y | V | V | C | R | V | 3  | 74  | 2 |
|    |   |   |   |   |   |   | 18 | 38  | 2 |
| 26 | A | V | V | Y | R | I | 3  | 108 | 2 |
|    |   |   |   |   |   |   | 5  | 44  | 2 |
|    |   |   |   |   |   |   | 7  | 13  | 2 |
|    |   |   |   |   |   |   | 16 | 33  | 2 |
|    |   |   |   |   |   |   | 18 | 57  | 2 |
|    |   |   |   |   |   |   | 20 | 21  | 2 |
|    |   |   |   |   |   |   | 20 | 17  | 2 |
|    |   |   |   |   |   |   | 21 | 5   | 2 |
| 27 | A | I | V | V | R | V | 4  | 56  | 2 |
|    |   |   |   |   |   |   | 13 | 5   | 1 |
|    |   |   |   |   |   |   | 20 | 7   | 2 |
| 28 | Y | C | V | M | V | V | 4  | 90  | 2 |
| 29 | G | L | V | M | K | V | 4  | 61  | 2 |
| 30 | A | L | V | Y | K | V | 4  | 71  | 2 |
|    |   |   |   |   |   |   | 16 | 22  | 2 |
|    |   |   |   |   |   |   | 20 | 11  | 2 |
| 31 | A | L | V | Y | R | I | 4  | 77  | 3 |
| 32 | G | L | V | Y | R | I | 4  | 54  | 2 |
|    |   |   |   |   |   |   | 17 | 22  | 2 |
| 33 | Y | G | V | V | R | I | 4  | 79  | 2 |
| 34 | A | V | V | L | R | I | 4  | 70  | 2 |
|    |   |   |   |   |   |   | 6  | 6   | 2 |
|    |   |   |   |   |   |   | 7  | 6   | 2 |
|    |   |   |   |   |   |   | 8  | 5   | 2 |
|    |   |   |   |   |   |   | 20 | 6   | 2 |
| 35 | G | M | V | M | V | I | 4  | 45  | 2 |
| 36 | A | V | V | M | R | I | 4  | 78  | 2 |
| 37 | A | C | V | Y | K | M | 4  | 68  | 2 |
|    |   |   |   |   |   |   | 13 | 64  | 2 |
| 38 | A | L | V | Y | V | V | 4  | 67  | 2 |
| 39 | G | L | V | M | R | I | 5  | 49  | 2 |
|    |   |   |   |   |   |   | 7  | 8   | 2 |
|    |   |   |   |   |   |   | 8  | 4   | 2 |
|    |   |   |   |   |   |   | 17 | 32  | 2 |
|    |   |   |   |   |   |   | 17 | 33  | 2 |
| 40 | Y | A | V | C | V | V | 5  | 28  | 2 |
| 41 | G | V | V | M | R | I | 5  | 36  | 2 |
| 42 | A | I | V | Y | K | I | 5  | 25  | 2 |
|    |   |   |   |   |   |   | 20 | 10  | 2 |
| 43 | G | L | V | V | R | V | 6  | 29  | 2 |
| 44 | A | L | V | M | K | M | 6  | 17  | 2 |
| 45 | A | C | V | Y | R | V | 6  | 33  | 2 |
| 46 | A | I | V | M | K | V | 6  | 21  | 2 |

|    |   |   |   |   |   |   |    |    |   |
|----|---|---|---|---|---|---|----|----|---|
| 47 | G | V | V | Y | R | I | 6  | 37 | 2 |
|    |   |   |   |   |   |   | 8  | 4  | 2 |
|    |   |   |   |   |   |   | 20 | 19 | 2 |
|    |   |   |   |   |   |   | 20 | 24 | 2 |
|    |   |   |   |   |   |   | 20 | 14 | 2 |
|    |   |   |   |   |   |   | 21 | 3  | 2 |
|    |   |   |   |   |   |   | 21 | 3  | 2 |
| 48 | G | M | V | M | R | I | 7  | 5  | 2 |
|    |   |   |   |   |   |   | 8  | 4  | 2 |
|    |   |   |   |   |   |   | 21 | 5  | 2 |
| 49 | A | A | V | Y | R | V | 7  | 5  | 2 |
|    |   |   |   |   |   |   | 8  | 9  | 2 |
| 50 | G | M | V | M | R | V | 7  | 5  | 2 |
| 51 | Y | L | V | M | R | I | 11 | 38 | 2 |
| 52 | Y | L | V | A | R | V | 11 | 39 | 2 |
| 53 | Y | L | V | G | R | V | 11 | 13 | 2 |
| 54 | Y | C | V | C | V | V | 12 | 40 | 2 |
| 55 | Y | M | V | C | K | V | 12 | 11 | 2 |
| 56 | Y | V | V | N | R | I | 12 | 10 | 2 |
| 57 | A | M | V | Y | R | V | 12 | 23 | 2 |
| 58 | Y | A | V | A | R | I | 12 | 24 | 2 |
| 59 | A | I | V | M | R | V | 13 | 32 | 2 |
| 60 | Y | Y | V | V | R | V | 13 | 23 | 2 |
| 61 | Y | V | V | A | R | C | 13 | 30 | 2 |
| 62 | Y | C | V | S | R | I | 13 | 40 | 2 |
| 63 | G | V | V | L | V | I | 13 | 16 | 2 |
| 64 | Y | G | V | A | R | V | 13 | 69 | 2 |
| 65 | A | C | V | I | R | I | 13 | 53 | 2 |
| 66 | A | V | V | C | K | I | 13 | 45 | 2 |
|    |   |   |   |   |   |   | 20 | 6  | 2 |
| 67 | Y | V | V | L | R | I | 14 | 87 | 1 |
| 68 | Y | L | V | I | R | I | 14 | 81 | 2 |
| 69 | Y | M | V | N | R | V | 14 | 57 | 2 |
| 70 | Y | V | V | A | V | M | 14 | 74 | 2 |
| 71 | Y | V | V | Y | K | M | 14 | 73 | 2 |
| 72 | Y | C | V | S | R | C | 14 | 31 | 2 |
| 73 | Y | L | V | Y | K | V | 14 | 26 | 1 |
| 74 | G | C | V | Y | K | I | 15 | 7  | 2 |
| 75 | A | A | V | V | K | I | 15 | 7  | 2 |
| 76 | A | A | V | L | K | I | 15 | 6  | 2 |
| 77 | G | A | V | L | R | I | 15 | 8  | 2 |
| 78 | A | A | V | L | R | V | 15 | 8  | 2 |
| 79 | A | V | V | A | K | I | 15 | 8  | 2 |
| 80 | A | A | V | I | K | I | 16 | 10 | 2 |
| 81 | A | L | V | Y | K | I | 16 | 16 | 2 |

|     |   |   |   |   |   |   |    |    |   |
|-----|---|---|---|---|---|---|----|----|---|
|     |   |   |   |   |   |   | 18 | 29 | 2 |
| 82  | A | V | V | L | K | I | 16 | 13 | 2 |
| 83  | A | V | V | Y | R | C | 16 | 25 | 2 |
| 84  | A | M | V | Y | R | I | 16 | 11 | 2 |
| 85  | A | C | V | Y | R | I | 17 | 34 | 2 |
| 86  | A | C | V | V | R | I | 17 | 28 | 2 |
| 87  | G | I | V | C | R | I | 17 | 27 | 2 |
| 88  | M | L | V | Y | R | I | 18 | 36 | 2 |
| 89  | Y | C | V | Y | R | C | 18 | 32 | 2 |
| 90  | L | M | V | Y | R | I | 18 | 29 | 2 |
| 91  | Y | V | V | V | R | V | 18 | 37 | 2 |
| 92  | F | V | V | S | V | V | 18 | 4  | 2 |
| 93  | Y | L | V | L | K | V | 18 | 65 | 2 |
| 94  | Y | V | V | Y | K | V | 18 | 25 | 2 |
| 95  | M | L | V | Y | V | I | 18 | 30 | 2 |
| 96  | Y | L | V | S | R | V | 18 | 47 | 2 |
| 97  | A | L | V | V | K | V | 19 | 45 | 2 |
| 98  | Y | V | V | C | R | I | 19 | 25 | 2 |
| 99  | G | L | V | M | V | I | 19 | 53 | 2 |
| 100 | A | L | V | M | K | V | 19 | 63 | 2 |
| 101 | A | L | V | A | R | I | 20 | 6  | 2 |
| 102 | A | I | V | A | R | I | 20 | 7  | 2 |
| 103 | A | L | V | Y | R | V | 20 | 24 | 2 |
| 104 | G | L | V | M | K | I | 20 | 12 | 2 |
| 105 | G | I | V | Y | R | V | 20 | 5  | 2 |
| 106 | A | L | V | M | R | V | 20 | 11 | 2 |
| 107 | A | V | V | V | K | I | 20 | 8  | 2 |
| 108 | A | A | V | I | R | I | 20 | 5  | 2 |
| 109 | A | V | V | Y | R | V | 20 | 12 | 2 |
| 110 | A | I | V | Y | R | M | 21 | 4  | 2 |

**Supplementary Table 3.** ESI-TOF data from purified wild-type mTFP1 (WT) and mTFP1 containing ncAAs **1–35**.

| ncAA            | Theoretical Mass (Da) | Experimental Mass (Da) | $\pm$ Mass (Da) |
|-----------------|-----------------------|------------------------|-----------------|
| WT <sup>a</sup> | 25154.5               | 25154.7                | 0.2             |
| 1               | 25252.6               | 25251.8                | 0.8             |
| 2               | 25266.6               | 25265.1                | 1.5             |
| 3               | 25280.7               | 25280.2                | 0.5             |
| 4               | 25294.7               | 25294.4                | 0.3             |
| 5               | 25308.7               | 25306.2                | 2.5             |
| 6               | 25322.7               | 25320.9                | 1.8             |
| 7               | 25336.8               | 25334.9                | 1.9             |
| 8               | 25350.8               | 25349.3                | 1.5             |
| 9               | 25364.8               | NA                     | NA              |
| 10              | 25250.6               | 25250.2                | 0.4             |
| 11              | 25264.6               | 25264.4                | 0.2             |
| 12              | 25278.6               | 25277.3                | 1.3             |
| 13              | 25292.7               | 25291.4                | 1.3             |
| 14              | 25295.6               | 25293.4                | 2.2             |
| 15              | 25320.7               | 25318.9                | 1.8             |
| 16              | 25318.7               | 25318.5                | 0.2             |
| 17              | 25344.7               | 25342.3                | 2.4             |
| 18              | 25294.6               | 25293.1                | 1.5             |
| 19              | 25344.6               | 25342.2                | 2.4             |
| 20              | 25394.6               | 25394.6                | 0.0             |
| 21              | 25458.6               | 25457.1                | 1.5             |
| 22              | 25558.6               | NA                     | NA              |
| 23              | 25362.6               | NA                     | NA              |
| 24              | 25390.6               | 25389.1                | 1.5             |
| 25              | 25356.6               | 25355.5                | 1.1             |
| 26              | 25370.7               | 25368.5                | 2.2             |
| 27              | 25438.7               | NA                     | NA              |
| 28              | 25348.8               | 25347.8                | 1.0             |
| 29              | 25348.8               | 25347.5                | 1.3             |
| 30              | 25292.7               | 25290.5                | 2.2             |
| 31              | 25303.6               | 25302.1                | 1.5             |
| 32              | 25322.7               | 25321.4                | 1.3             |
| 33              | 25438.6               | 25437.1                | 1.5             |
| 34              | 25386.7               | 25384.6                | 2.1             |
| 35              | 25424.8               | 25423.9                | 0.9             |

a) WT has the amino acid asparagine (Asn) in position 128.

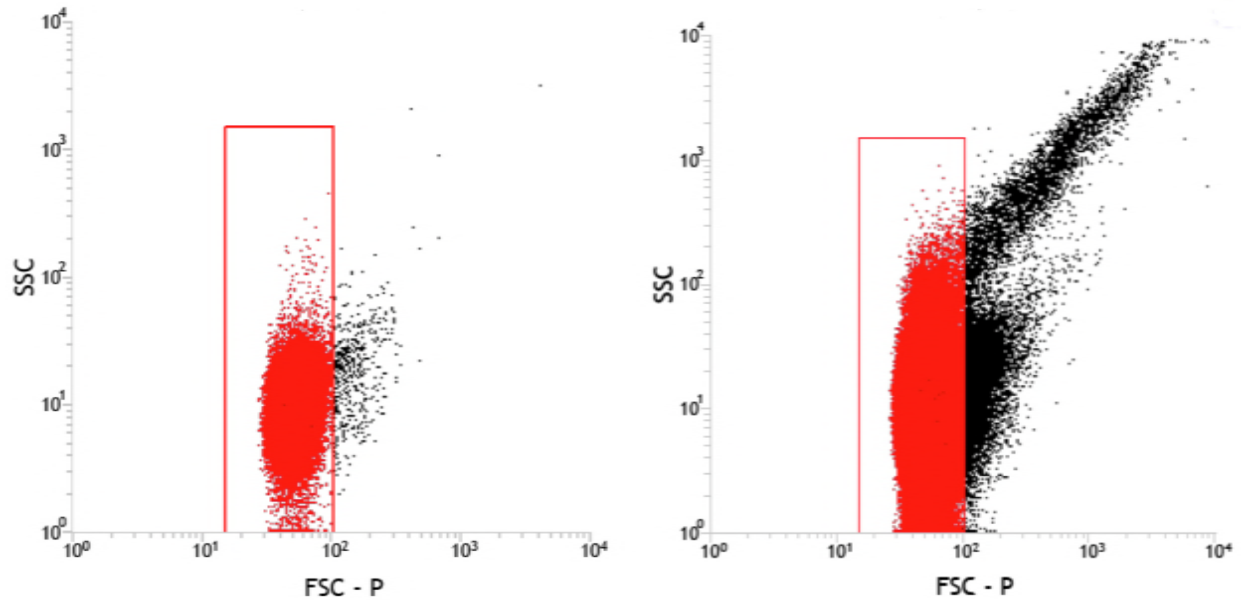

**Supplementary Figure 1.** *E. coli* cells harboring pEVOL303\_Lib were grown with either ncAA 1 (left) or ncAA 9 (right). The forward (FSC-P) and side (SSC) scatters of each cell were analyzed by FACS. Cells located inside the sorting gate are indicated by the red box. The increased forward and side scatter signals upon ncAA 9 addition indicated cell aggregation.

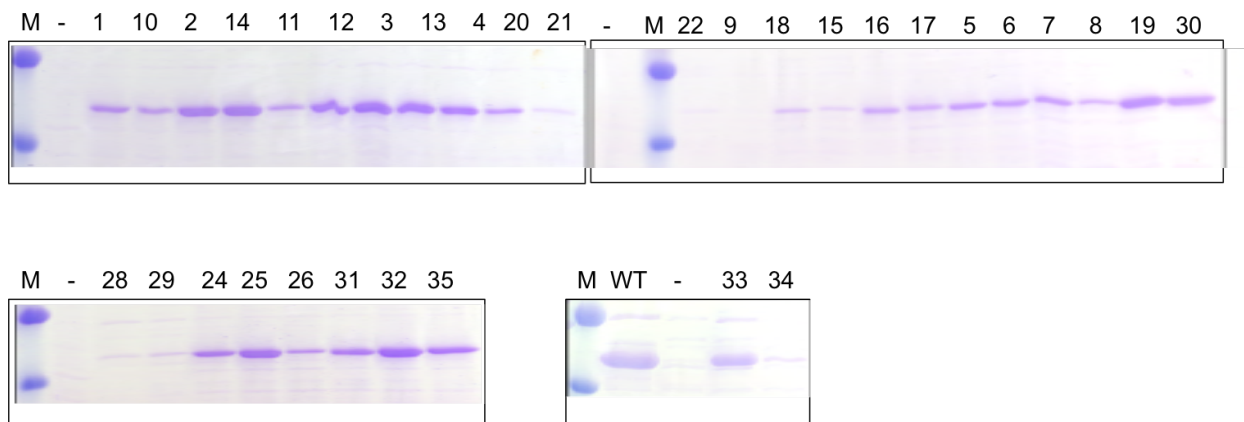

**Supplementary Figure 2.** SDS-PAGE analysis of the heat-treated *E. coli* lysate containing mTFP1 with an N-terminal His<sub>6</sub>-SUMO tag. mTFP1<sub>TAG128</sub> was co-expressed with the HpRS/tRNA<sup>Pyl</sup> pair, both with and without ncAAs 1–35 (1 mM). ncAA 23 and 27 were not incorporated into the mTFP1 (data not shown). Marker bands indicate 36 and 55 kDa.

## S2. Synthesis

### S2.1 General Procedure

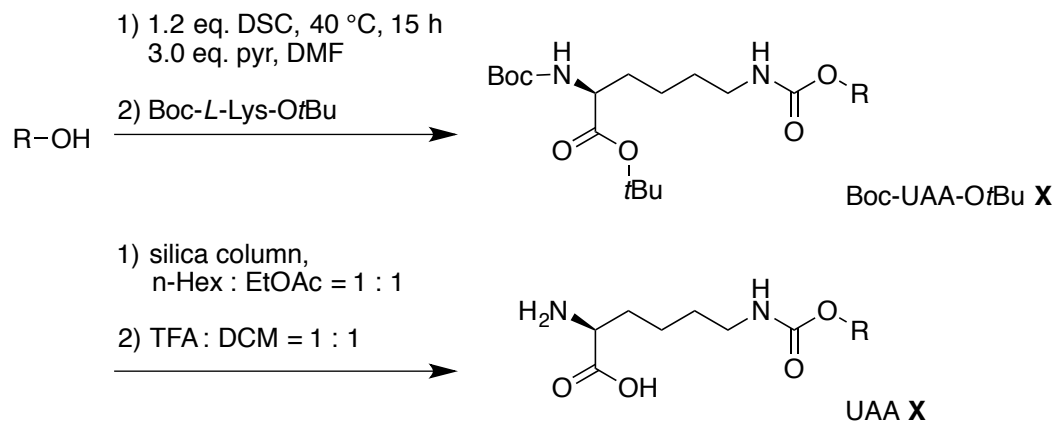

N,N-Disuccinimidyl carbonate (DSC) (0.613 g, 1.2 eq.) and pyridine (0.28 ml, 3.0 eq.) were added to a solution of alcohol (2.0 mmol) in anhydrous dimethylformamide (DMF) (3 mL). The mixture was stirred at 40 °C for 15 h until the alcohol was completely activated, as observed by the thin-layer chromatography control. The mixture was cooled to room temperature and Boc-L-lysine-OtBu (Novabiochem, 2 mmol) was added at a rate that kept the reaction temperature below 30 °C. Then, the mixture was stirred overnight at room temperature. After the carbamate was formed (TLC control), H<sub>2</sub>O (10 mL) and EtOAc (10 mL) were added to the mixture. The organic layer was separated, and the aqueous layer was extracted with EtOAc (5 mL). The organic layer was subsequently washed with 1 N HCl, H<sub>2</sub>O, and brine, then dried on MgSO<sub>4</sub>. To protect the ncAAs as an oil, the organic solution was concentrated and column chromatography (n-hexane : EtOAc = 1 : 1) was performed. Then, a 1:1 mixture of TFA : CH<sub>2</sub>Cl<sub>2</sub> was used for deprotection. After completing deprotection (confirmed by TLC), all volatiles were removed *in vacuo* and any residue was dissolved in methanol. Cold diethyl ether was added to precipitate the pure ncAA, which was filtered out and dried *in vacuo*.

### S2.1.1 Synthesis of ncAA 2

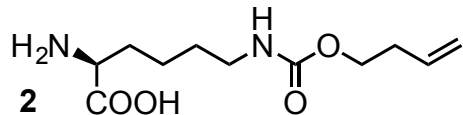

#### Boc-ncAA-OtBu 2

$^1\text{H-NMR}$  ( $\text{CDCl}_3$ , 400 MHz):  $\delta$  = 1.23-1.27 (m, 2H), 1.30 (s, 9H), 1.32 (s, 9H), 1.35-1.63 (m, 4H), 2.19-2.24 (m, 2H), 2.99-3.04 (m, 2H), 3.93-4.00 (m, 3H), 4.90-4.98 (m, 2H), 5.16 (br, 2H), 5.59-5.69 (m, 1H).

$^{13}\text{C-NMR}$  ( $\text{CDCl}_3$ , 100 MHz):  $\delta$  = 171.86, 156.62, 155.39, 134.14, 116.82, 81.50, 79.31, 63.56, 53.70, 46.72, 33.38, 27.83, 22.24.

#### ncAA 2

$^1\text{H-NMR}$  ( $\text{D}_2\text{O}$ , 400 MHz):  $\delta$  = 1.42-1.58 (m, 4H), 1.89 (m, 2H), 2.34-2.39 (dd,  $J$  = 8.0, 4.0 Hz, 1H), 3.13 (t,  $J$  = 6.0 Hz), 3.89 (t,  $J$  = 7.5 Hz), 4.06 (m, 2H), 5.07 (m, 2H), 5.84 (m, 1H).

$^{13}\text{C-NMR}$  ( $\text{D}_2\text{O}$ , 100 MHz):  $\delta$  = 174.25, 158.80, 134.80, 117.26, 64.35, 54.45, 39.88, 29.98, 21.56.

HRMS:  $m/z$  calcd for  $\text{C}_{20}\text{H}_{36}\text{N}_2\text{O}_6$  [ $\text{M} + \text{Na}$ ] $^+$ : 400.2573; found:

### S2.1.2 Synthesis of ncAA 3

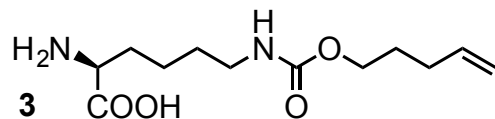

#### Boc-ncAA-OtBu 3

$^1\text{H-NMR}$  ( $\text{CDCl}_3$ , 400 MHz):  $\delta$  = 1.30 (s, 9H), 1.32 (s, 9H), 1.34-1.63 (m, 8H), 1.96 (d, 2H,  $J$  = 4.0 Hz), 3.0 (br, 2H), 4.82 (d,  $J$  = 8.0 Hz), 4.87 (d,  $J$  = 16.0 Hz), 5.16 (br, 2H), 5.19 (m, 2H), 5.59-5.69 (m, 1H).

$^{13}\text{C}$ -NMR ( $\text{CDCl}_3$ , 100 MHz):  $\delta = 171.83, 156.71, 155.37, 137.44, 114.93, 81.42, 79.22, 63.84, 53.68, 40.36, 29.85, 28.17, 27.81, 22.24$ .

### ncAA 3

$^1\text{H}$ -NMR ( $\text{D}_2\text{O}$ , 400 MHz):  $\delta = 0.99\text{-}1.21$  (m, 4H), 1.22-1.25 (m, 2H), 1.43 (m, 2H), 1.53 (q,  $J = 16.0$  Hz, 1H), 3.59 (m, 3H), 4.55 (d,  $J = 8.0$  Hz), 4.60 (d,  $J = 16.0$  Hz), 5.37-5.42 (m, 1H).

$^{13}\text{C}$ -NMR ( $\text{D}_2\text{O}$ , 100 MHz):  $^{13}\text{C}$ -NMR ( $\text{CDCl}_3$ , 100 MHz):  $\delta = 171.46, 158.41, 137.99, 114.45, 64.54, 52.39, 39.62, 29.07, 28.17, 27.14, 21.18$ .

### S2.1.3 Synthesis of ncAA 4

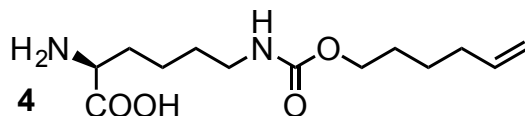

### Boc-ncAA-OtBu 4

$^1\text{H}$ -NMR ( $\text{CDCl}_3$ , 400 MHz):  $\delta = 1.21$  (s, 9H), 1.24 (s, 9H), 1.32-1.40 (m, 10H), 1.85 (dd, 2H,  $J = 10.0$  Hz), 2.91 (br, 2H), 3.81 (t, 2H,  $J = 4.0$  Hz), 3.90 (m, 1H), 4.73 (d,  $J = 12.0$  Hz), 4.77 (d,  $J = 20.0$  Hz), 5.23-5.35 (m, 2H), 5.55 (m, 1H).

$^{13}\text{C}$ -NMR ( $\text{CDCl}_3$ , 100 MHz):  $\delta = 171.79, 156.74, 155.33, 138.07, 114.53, 81.22, 79.02, 64.16, 53.69, 40.23, 33.09, 32.01, 29.24, 28.31, 28.10, 27.72, 24.90, 22.21$ .

### ncAA 4

$^1\text{H}$ -NMR ( $\text{D}_2\text{O}$ , 400 MHz):  $\delta = 0.63\text{-}0.83$  (m, 8H), 1.14-1.25 (m, 4H), 2.32 (m, 2H), 3.23 (m, 3H), 4.13 (d, 2H,  $J = 12.0$  Hz), 4.77 (d, 2H,  $J = 20.0$  Hz), 5.02 (m, 1H).

$^{13}\text{C}$ -NMR ( $\text{D}_2\text{O}$ , 100 MHz):  $\delta = 170.75, 157.88, 137.79, 113.32, 64.53, 52.02, 30.02, 27.02, 23.87, 20.93$ .



### S2.1.4 Synthesis of ncAA 5

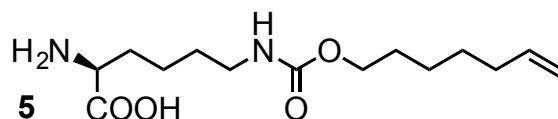

#### Boc-ncAA-OtBu 5

<sup>1</sup>H-NMR (CDCl<sub>3</sub>, 400 MHz): δ = 1.31 (s, 9H), 1.33 (s, 9H), 1.41-1.49 (m, 12H), 1.92 (dd, 2H, *J* = 6.0 Hz), 3.02 (br, 2H), 3.91 (t, 2H, *J* = 6.0 Hz), 4.01 (br, 1H), 4.80 (d, *J* = 9.0 Hz), 4.86 (d, *J* = 16.0 Hz), 5.16 (br, 2H), 5.67 (m, 1H).

<sup>13</sup>C-NMR (CDCl<sub>3</sub>, 100 MHz): δ = 171.86, 156.80, 155.38, 138.50, 114.34, 81.41, 79.28, 64.53, 53.68, 40.40, 33.48, 32.27, 29.35, 28.78, 28.38, 28.20, 27.84, 25.21, 22.25.

#### ncAA 5

<sup>1</sup>H-NMR (D<sub>2</sub>O, 400 MHz): δ = 0.54-0.80 (m, 12H), 1.22 (m, 2H), 2.32 (m, 2H), 3.26 (m, 3H), 4.12 (d, 2H, *J* = 20.0 Hz), 4.20 (d, 2H, *J* = 16.0 Hz), 4.63 (m, 1H).

<sup>13</sup>C-NMR (D<sub>2</sub>O, 100 MHz): δ = 171.05, 158.05, 138.67, 113.12, 64.79, 52.13, 39.31, 32.27, 28.77, 27.77, 27.20, 23.98, 20.85.

### S2.1.5 Synthesis of ncAA 6

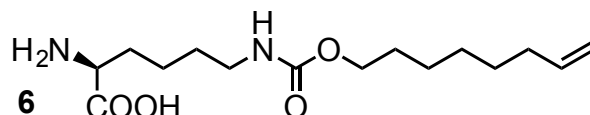

#### Boc-ncAA-OtBu 6

<sup>1</sup>H-NMR (CDCl<sub>3</sub>, 400 MHz): δ = 1.21 (s, 9H), 1.23 (s, 9H), 1.15-1.37 (m, 14H), 1.81 (dd, 2H, *J* = 6.0 Hz), 2.92 (br, 2H), 3.80 (M, 2H), 3.90 (m, 1H), 4.70 (d, *J* = 12.0 Hz), 4.75 (d, *J* = 16.0 Hz), 5.24-5.35 (m, 2H), 5.52-5.58 (m, 1H).

<sup>13</sup>C-NMR (CDCl<sub>3</sub>, 100 MHz): δ = 171.79, 156.76, 155.33, 138.49, 114.12, 81.17, 78.98, 64.33, 53.68, 40.21, 33.42, 32.01, 29.24, 28.72, 28.52, 27.71, 25.60, 22.20.

## ncAA 6

$^1\text{H-NMR}$  ( $\text{D}_2\text{O}$ , 400 MHz):  $\delta$  = 0.26-0.68 (m, 14H), 1.15 (m, 2H), 2.24 (m, 2H), 3.15 (m, 3H), 4.03 (d, 2H,  $J$  = 12.0 Hz), 4.10 (d, 2H,  $J$  = 16.0 Hz), 4.91-4.97 (m, 1H).

$^{13}\text{C-NMR}$  ( $\text{D}_2\text{O}$ , 100 MHz):  $\delta$  = 170.86, 158.04, 138.63, 113.12, 65.13, 52.47, 39.11, 32.09, 28.77, 27.70, 27.30, 24.60, 20.83.

### S2.1.6 Synthesis of ncAA 7

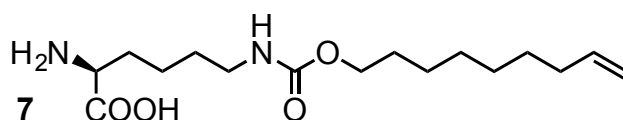

#### Boc-ncAA-OtBu 7

$^1\text{H-NMR}$  ( $\text{CDCl}_3$ , 400 MHz):  $\delta$  = 1.18 (s, 9H), 1.24 (s, 9H), 1.12-1.37 (m, 16H), 1.83 (dd, 2H,  $J$  = 6.0 Hz), 2.96 (m, 2H), 3.82 (m, 2H), 3.93 (m, 1H), 4.72 (d,  $J$  = 12.0 Hz), 4.78 (d,  $J$  = 16.0 Hz), 5.25-5.30 (m, 2H), 5.55-5.60 (m, 1H).

$^{13}\text{C-NMR}$  ( $\text{CDCl}_3$ , 100 MHz):  $\delta$  = 171.80, 156.77, 155.34, 138.63, 114.07, 81.23, 79.03, 64.40, 53.68, 40.25, 33.51, 32.54, 29.26, 28.92, 28.76, 28.58, 28.12, 27.74, 25.61, 22.21.

#### ncAA 7

$^1\text{H-NMR}$  ( $\text{D}_2\text{O}$ , 400 MHz):  $\delta$  = 0.60-0.88 (m, 14H), 1.21 (m, 4H), 2.40 (m, 2H), 3.29 (m, 3H), 3.34 (t, 1H,  $J$  = 8.0 Hz), 4.19 (d, 2H,  $J$  = 8.0 Hz), 4.26 (d, 2H,  $J$  = 20.0 Hz), 5.04-5.10 (m, 1H).

$^{13}\text{C-NMR}$  ( $\text{D}_2\text{O}$ , 100 MHz):  $\delta$  = 171.05, 158.04, 138.19, 113.11, 64.80, 52.21, 39.46, 32.83, 28.83, 28.24, 28.05, 28.00, 27.94, 27.86, 24.84, 21.07.

### S2.1.7 Synthesis of ncAA 8

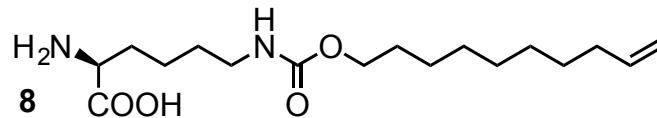

#### Boc-ncAA-OtBu 8

<sup>1</sup>H-NMR (CDCl<sub>3</sub>, 400 MHz): δ = 1.29 (s, 9H), 1.34 (s, 9H), 1.15-1.37 (m, 18H), 1.88 (dd, 2H, *J* = 6.0 Hz), 3.00 (m, 2H), 3.87 (m, 2H), 3.97 (m, 1H), 4.76 (d, *J* = 8.0 Hz), 4.82 (d, *J* = 16.0 Hz), 5.22 (m, 2H), 5.58-5.68 (m, 1H).

<sup>13</sup>C-NMR (CDCl<sub>3</sub>, 100 MHz): δ = 171.85, 156.84, 155.39, 138.77, 114.05, 81.38, 79.20, 64.55, 62.31, 53.68, 40.32, 33.59, 29.31, 29.29, 29.20, 29.08, 28.91, 28.85, 28.70, 28.16, 27.79, 25.69, 22.23.

#### ncAA 8

<sup>1</sup>H-NMR (D<sub>2</sub>O, 400 MHz): δ = 0.7-1.06 (m, 16H), 1.42-1.49 (m, 4H), 2.56 (m, 2H), 3.45 (m, 2H), 3.51 (t, 1H, *J* = 8.0 Hz), 4.35 (d, 2H, *J* = 8.0 Hz), 4.41 (d, 2H, *J* = 16.0 Hz), 5.17-5.27 (m, 1H).

<sup>13</sup>C-NMR (D<sub>2</sub>O, 100 MHz): δ = 171.24, 158.04, 138.12, 113.37, 65.02, 52.23, 39.86, 33.15, 28.79, 28.66, 28.49, 28.31, 28.20, 25.01, 21.26.

### S2.1.8 Synthesis of ncAA 9

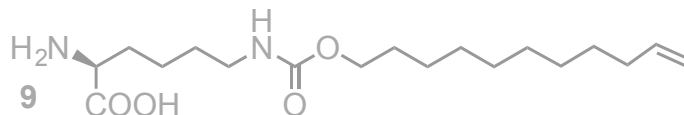

#### Boc-ncAA-OtBu 9

<sup>1</sup>H-NMR (CDCl<sub>3</sub>, 400 MHz): δ = 1.21 (s, 9H), 1.28 (s, 9H), 1.52 (m, 20H), 1.96 (dd, 2H, *J* = 6.0 Hz), 3.08 (m, 2H), 3.95 (m, 2H), 4.07 (m, 1H), 4.85 (d, *J* = 8.0 Hz), 4.86 (d, *J* = 16.0 Hz), 5.15 (m, 1H), 5.76-5.78 (m, 1H).

$^{13}\text{C}$ -NMR ( $\text{CDCl}_3$ , 100 MHz):  $\delta = 171.89, 156.83, 155.41, 138.99, 114.07, 81.61, 79.42, 64.72, 53.68, 40.47, 33.59, 29.60, 29.39, 29.31, 29.19, 29.00, 28.81, 28.25, 28.70, 27.90, 27.79, 25.69, 21.95$ .

#### ncAA **9**

$^1\text{H}$ -NMR ( $\text{D}_2\text{O}$ , 400 MHz):  $\delta = -0.18-0.4$  (m, 18H), 0.68 (m, 4H), 2.56 (m, 2H), 1.82 (m, 2H), 2.71 (m, 3H), 3.57 (d, 2H,  $J = 12.0$  Hz), 3.65 (d, 2H,  $J = 16.0$  Hz), 5.17-5.27 (m, 1H).

$^{13}\text{C}$ -NMR ( $\text{D}_2\text{O}$ , 100 MHz):  $\delta = 170.34, 157.91, 138.93, 111.94, 64.99, 51.84, 38.79, 31.94, 28.17, 27.42, 27.35, 27.22, 27.12, 27.01, 26.84, 23.87, 20.34$ .

#### S2.1.9 Synthesis of ncAA **10**

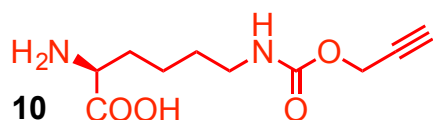

#### Boc-ncAA-OtBu **10**

$^1\text{H}$ -NMR ( $\text{CDCl}_3$ , 400 MHz):  $\delta = 1.31$  (s, 9H), 1.33 (s, 9H), 1.57 (m, 6H), 2.47 (m, 2H), 3.20 (m, 2H), 4.15 (m, 1H), 4.68 (br, 2H), 4.97 (br, 1H), 5.11 (br, 1H).

$^{13}\text{C}$ -NMR ( $\text{CDCl}_3$ , 100 MHz):  $\delta = 171.87, 156.18, 155.41, 81.67, 80.34, 79.49, 69.55, 62.36, 53.67, 40.55, 33.59, 29.60, 28.27, 27.92, 27.81, 22.27, 19.32$ .

#### ncAA **10**

$^1\text{H}$ -NMR ( $\text{D}_2\text{O}$ , 400 MHz):  $\delta = 1.31$  (m, 2H), 1.45 (m, 2H), 1.78 (m, 2H), 2.78 (m, 1H), 3.05 (t, 2H,  $J = 6.0$  Hz), 3.67 (t, 2H,  $J = 6.0$  Hz), 4.56 (s, 2H).

$^{13}\text{C}$ -NMR ( $\text{D}_2\text{O}$ , 100 MHz):  $\delta = 174.34, 157.68, 78.81, 75.53, 54.72, 52.25, 40.09, 30.01, 28.16, 21.53$ .

### S2.1.10 Synthesis of ncAA 11

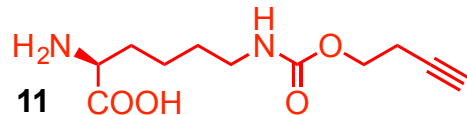

#### Boc-ncAA-OtBu 11

<sup>1</sup>H-NMR (CDCl<sub>3</sub>, 400 MHz): δ = 1.31 (s, 9H), 1.33 (s, 9H), 1.27-1.53 (m, 6H), 1.94 (t, 1H, *J* = 8.0 Hz), 2.43 (t, 2H, *J* = 6.0 Hz), 3.08 (m, 2H), 4.07 (m, 3H), 5.09 (br, 2H).

<sup>13</sup>C-NMR (CDCl<sub>3</sub>, 100 MHz): δ = 171.87, 156.18, 155.41, 81.67, 80.34, 79.49, 69.55, 62.36, 53.67, 40.55, 33.59, 29.60, 28.27, 27.92, 27.81, 22.27, 19.32.

#### ncAA11

<sup>1</sup>H-NMR (D<sub>2</sub>O, 400 MHz): δ = 1.26-1.39 (m, 4H), 1.68-1.75 (m, 2H), 2.28 (m, 1H), 2.43 (m, 2H), 3.02 (m, 2H), 3.63 (m, 1H), 4.03 (m, 2H).

<sup>13</sup>C-NMR (D<sub>2</sub>O, 100 MHz): δ = 174.59, 158.36, 82.02, 70.79, 62.68, 54.60, 40.14, 30.04, 28.56, 21.55, 18.66.

### S2.1.11 Synthesis of ncAA 12

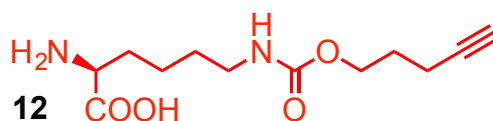

#### Boc-ncAA-OtBu 12

<sup>1</sup>H-NMR (CDCl<sub>3</sub>, 400 MHz): δ = 1.31 (s, 9H), 1.33 (s, 9H), 1.41-1.59 (m, 6H), 1.56-1.59 (m, 2H), 1.68 (m, 1H), 2.21 (t, 2H, *J* = 6.0 Hz), 3.10 (t, 2H, *J* = 6.0 Hz), 4.09 (m, 3H), 4.92-5.09 (br, 2H).

<sup>13</sup>C-NMR (CDCl<sub>3</sub>, 100 MHz): δ = 171.87, 156.53, 155.43, 83.15, 81.73, 79.54, 68.89, 63.20, 53.66, 40.63, 32.53, 28.28, 27.94, 22.30, 15.10.

## ncAA 12

$^1\text{H-NMR}$  ( $\text{D}_2\text{O}$ , 400 MHz):  $\delta$  = 1.28-1.41 (m, 4H), 1.70-1.74 (m, 4H), 2.22 (m, 2H), 2.23 (m, 1H), 3.01 (m, 2H), 3.63 (t, 2H,  $J$  = 6.0 Hz), 4.04 (t, 2H,  $J$  = 6.0 Hz).

$^{13}\text{C-NMR}$  ( $\text{D}_2\text{O}$ , 100 MHz):  $\delta$  = 174.25, 158.77, 84.88, 69.55, 64.09, 54.50, 39.87, 30.00, 28.52, 27.21, 21.56, 14.32.

### S2.1.12 Synthesis of ncAA 13

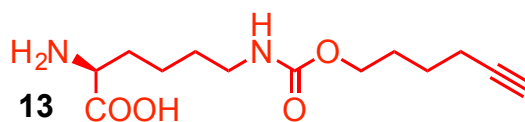

### Boc-ncAA-OtBu 13

$^1\text{H-NMR}$  ( $\text{CDCl}_3$ , 400 MHz):  $\delta$  = 1.19 (s, 9H), 1.21 (s, 9H), 1.26-1.35 (m, 10H), 1.78 (m, 1H), 1.96 (m, 2H), 2.90 (m, 2H), 3.81 (m, 2H), 3.87 (m, 1H), 5.23 (m, 1H), 5.39 (br, 1H).

$^{13}\text{C-NMR}$  ( $\text{CDCl}_3$ , 100 MHz):  $\delta$  = 171.77, 156.63, 155.31, 83.58, 81.18, 78.99, 68.81, 63.68, 53.68, 40.22, 28.09, 27.90, 27.71, 24.64, 22.21, 17.79.

## ncAA 13

$^1\text{H-NMR}$  ( $\text{D}_2\text{O}$ , 400 MHz):  $\delta$  = 0.98-1.24 (m, 8H), 1.41 (m, 2H), 1.51 (m, 2H), 1.75 (t, 2H,  $J$  = 4.0 Hz), 1.77 (m, 1H), 2.66 (t, 2H,  $J$  = 6.0 Hz), 3.60 (m, 2H).

$^{13}\text{C-NMR}$  ( $\text{D}_2\text{O}$ , 100 MHz):  $\delta$  = 171.45, 158.44, 85.55, 68.87, 64.68, 52.38, 39.59, 28.10, 27.05, 23.93, 21.15, 16.88.

### S2.1.13 Synthesis of ncAA 14

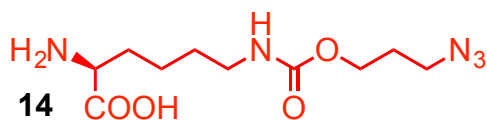

### Boc-ncAA-OtBu **14**

$^1\text{H-NMR}$  ( $\text{CDCl}_3$ , 400 MHz):  $\delta$  = 1.29 (s, 9H), 1.32 (s, 9H), 1.18-1.47 (m, 6H), 1.64 (m, 1H), 3.03 (dd, 2H,  $J$  = 8.0 Hz), 4.01 (m, 3H), 5.18 (m, 2H).

$^{13}\text{C-NMR}$  ( $\text{CDCl}_3$ , 100 MHz):  $\delta$  = 171.81, 156.38, 155.41, 81.53, 79.33, 61.39, 60.20, 53.68, 48.10, 40.47, 28.47, 28.18, 27.82, 22.27, 20.83.

### ncAA **14**

$^1\text{H-NMR}$  ( $\text{D}_2\text{O}$ , 400 MHz):  $\delta$  = 1.42-1.60 (m, 4H), 1.94 (m, 4H), 3.17 (m, 2H), 3.46 (m, 2H), 3.93 (m, 1H), 4.17 (m, 2H).

$^{13}\text{C-NMR}$  ( $\text{D}_2\text{O}$ , 100 MHz):  $\delta$  = 173.60, 159.12, 65.98, 62.64, 53.88, 48.02, 39.89, 27.65, 27.01, 21.50.

### S2.1.14 Synthesis of ncAA **18**

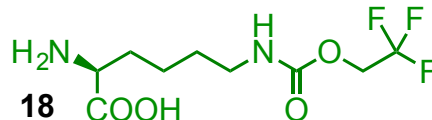

### Boc-ncAA-OtBu **18**

$^1\text{H-NMR}$  ( $\text{CDCl}_3$ , 400 MHz):  $\delta$  = 1.28 (s, 9H), 1.30 (s, 9H), 1.38 (m, 6H), 1.78 (m, 1H), 3.04 (dd, 2H,  $J$  = 6.0 Hz), 3.98 (m, 1H), 4.30 (dd, 2H,  $J$  = 8.0 Hz), 5.24 (m, 1H), 5.89 (m, 1H).

$^{13}\text{C-NMR}$  ( $\text{CDCl}_3$ , 100 MHz):  $\delta$  = 171.84, 155.47, 154.48, 121.72, 124.47, 81.49, 79.30, 60.24, 60.15, 59.88, 53.65, 40.66, 28.89, 28.01, 27.65, 27.39, 22.12.

### ncAA **18**

$^1\text{H-NMR}$  ( $\text{D}_2\text{O}$ , 400 MHz):  $\delta$  = 0.65-0.77 (m, 4H), 1.11-1.20 (m, 2H), 2.36 (t, 2H,  $J$  = 4.0 Hz), 3.25 (t, 2H,  $J$  = 6.0 Hz), 3.71 (q, 2H,  $J$  = 8.0 Hz).

$^{13}\text{C-NMR}$  ( $\text{D}_2\text{O}$ , 100 MHz):  $\delta$  = 170.87, 155.70, 52.08, 39.40, 28.65, 27.47, 20.51.

### S2.1.15 Synthesis of ncAA 19

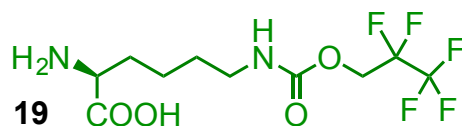

#### Boc-ncAA-OtBu 19

<sup>1</sup>H-NMR (CDCl<sub>3</sub>, 400 MHz): δ = 1.31 (s, 9H), 1.33 (s, 9H), 1.38-1.65 (m, 8H), 3.08 (dd, 2H, *J* = 6.0 Hz), 4.03 (m, 1H), 4.45 (dd, 2H, *J* = 12.0 Hz), 5.20 (m, 1H), 5.76 (m, 1H).

<sup>13</sup>C-NMR (CDCl<sub>3</sub>, 100 MHz): δ = 171.86, 155.48, 154.53, 81.57, 79.37, 60.24, 60.15, 59.88, 53.63, 40.76, 28.89, 28.01, 27.62, 27.39, 22.13.

#### ncAA 19

<sup>1</sup>H-NMR (D<sub>2</sub>O, 400 MHz): δ = 0.65-0.77 (m, 4H), 1.11-1.20 (m, 2H), 2.36 (t, 2H, *J* = 4.0 Hz), 3.25 (t, 2H, *J* = 6.0 Hz), 3.71 (q, 2H, *J* = 8.0 Hz).

<sup>13</sup>C-NMR (D<sub>2</sub>O, 100 MHz): δ = 170.87, 155.70, 52.08, 39.40, 28.65, 27.47, 20.51.

### S2.1.16 Synthesis of ncAA 20

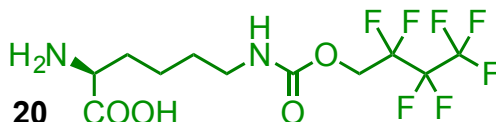

#### Boc-ncAA-OtBu 20

<sup>1</sup>H-NMR (CDCl<sub>3</sub>, 400 MHz): δ = 1.31 (s, 9H), 1.33 (s, 9H), 1.38-1.65 (m, 8H), 3.08 (dd, 2H, *J* = 6.0 Hz), 4.03 (m, 1H), 4.45 (dd, 2H, *J* = 12.0 Hz), 5.20 (m, 1H), 5.76 (m, 1H).

<sup>13</sup>C-NMR (CDCl<sub>3</sub>, 100 MHz): δ = 171.86, 155.48, 154.53, 81.57, 79.37, 60.24, 60.15, 59.88, 53.63, 40.76, 28.89, 28.01, 27.62, 27.39, 22.13.



## ncAA **20**

$^1\text{H-NMR}$  ( $\text{D}_2\text{O}$ , 400 MHz):  $\delta$  = 0.81-0.94 (m, 4H), 1.33 (m, 2H), 2.52 (t, 2H,  $J$  = 8.0 Hz), 3.42 (m, 2H), 3.71 (t, 2H,  $J$  = 12.0 Hz).

$^{13}\text{C-NMR}$  ( $\text{D}_2\text{O}$ , 100 MHz):  $\delta$  = 171.47, 155.92, 51.77, 39.43, 28.89, 27.12, 20.76.

## S2.1.17 Synthesis of ncAA **21**

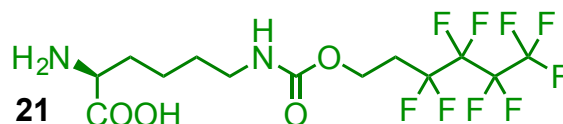

## Boc-ncAA-OtBu **21**

$^1\text{H-NMR}$  ( $\text{CDCl}_3$ , 400 MHz):  $\delta$  = 1.37 (s, 9H), 1.39 (s, 9H), 1.31-1.56 (m, 6H), 2.27 (m, 2H), 3.11 (m, 2H), 4.03 (m, 1H), 4.30 (m, 2H), 5.17 (m, 1H), 5.24 (m, 1H).

$^{13}\text{C-NMR}$  ( $\text{CDCl}_3$ , 100 MHz):  $\delta$  = 171.87, 155.88, 154.53, 81.67, 79.48, 56.42, 53.64, 40.56, 28.89, 28.01, 27.74, 22.23.

## ncAA **21**

$^1\text{H-NMR}$  ( $\text{D}_2\text{O}$ , 400 MHz):  $\delta$  = 0.60-0.73 (m, 4H), 1.11 (m, 2H), 1.63 (m, 2H), 2.29 (t, 2H,  $J$  = 6.0 Hz), 3.20 (m, 1H), 3.50 (t, 2H,  $J$  = 8.0 Hz).

$^{13}\text{C-NMR}$  ( $\text{D}_2\text{O}$ , 100 MHz):  $\delta$  = 171.46, 157.06, 56.67, 51.77, 39.46, 28.67, 27.10, 20.81.

### S2.1.18 Synthesis of ncAA 22

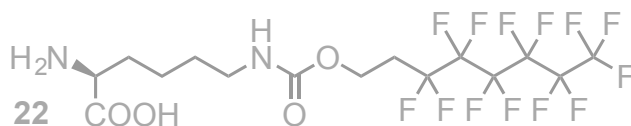

#### Boc-ncAA-OtBu 22

$^1\text{H-NMR}$  ( $\text{CDCl}_3$ , 400 MHz):  $\delta$  = 1.26 (s, 9H), 1.28 (s, 9H), 1.38 (m, 6H), 2.24-2.35 (m, 2H), 3.00 (m, 2H), 3.98 (m, 1H), 4.18 (m, 2H), 5.28 (m, 1H), 5.58 (m, 1H).

$^{13}\text{C-NMR}$  ( $\text{CDCl}_3$ , 100 MHz):  $\delta$  = 171.88, 155.91, 155.50, 81.66, 79.48, 56.44, 53.64, 40.55, 32.41, 30.96, 30.74, 30.53, 29.12, 28.04, 27.70, 22.23.

#### ncAA 22

$^1\text{H-NMR}$  ( $\text{D}_2\text{O}$ , 400 MHz):  $\delta$  = 0.36-0.45 (m, 4H), 0.85-0.92 (m, 2H), 1.36 (m, 2H), 2.05 (m, 2H), 2.96 (m, 1H), 3.26 (m, 2H).

$^{13}\text{C-NMR}$  ( $\text{D}_2\text{O}$ , 100 MHz):  $\delta$  = 170.69, 156.87, 56.33, 51.78, 39.08, 28.41, 27.11, 20.46.

### S2.1.19 Synthesis of ncAA 23

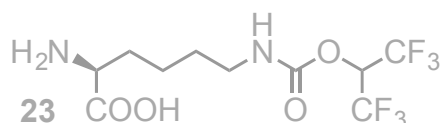

#### Boc-ncAA-OtBu 23

$^1\text{H-NMR}$  ( $\text{CDCl}_3$ , 400 MHz):  $\delta$  = 1.27 (s, 9H), 1.29 (s, 9H), 1.35-1.60 (m, 6H), 1.97 (dd, 2H,  $J$  = 4.0 Hz), 3.01 (m, 3H), 4.03 (m, 2H), 5.21 (m, 1H), 5.47 (m, 1H).

$^{13}\text{C-NMR}$  ( $\text{CDCl}_3$ , 100 MHz):  $\delta$  = 171.80, 155.95, 155.44, 81.41, 79.22, 60.50, 53.67, 40.40, 32.12, 27.95, 27.58, 22.19.

## ncAA 23

$^1\text{H-NMR}$  ( $\text{D}_2\text{O}$ , 400 MHz):  $\delta$  = 1.35-1.48 (m, 4H), 1.78 (m, 2H), 2.09 (m, 2H), 3.03 (t, 2H,  $J$  = 6.0 Hz), 3.95 03 (t, 2H,  $J$  = 8.0 Hz), 4.10 (m, 2H).

$^{13}\text{C-NMR}$  ( $\text{D}_2\text{O}$ , 100 MHz):  $\delta$  = 172.17, 158.22, 66.97, 52.82, 39.78, 29.35, 28.31, 22.81, 21.38, 16.91.

## S2.2 Synthesis of ncAAs with Acid-Sensitive Carbamates (ncAAs 28 and 29)

### S2.2.1 General Procedure

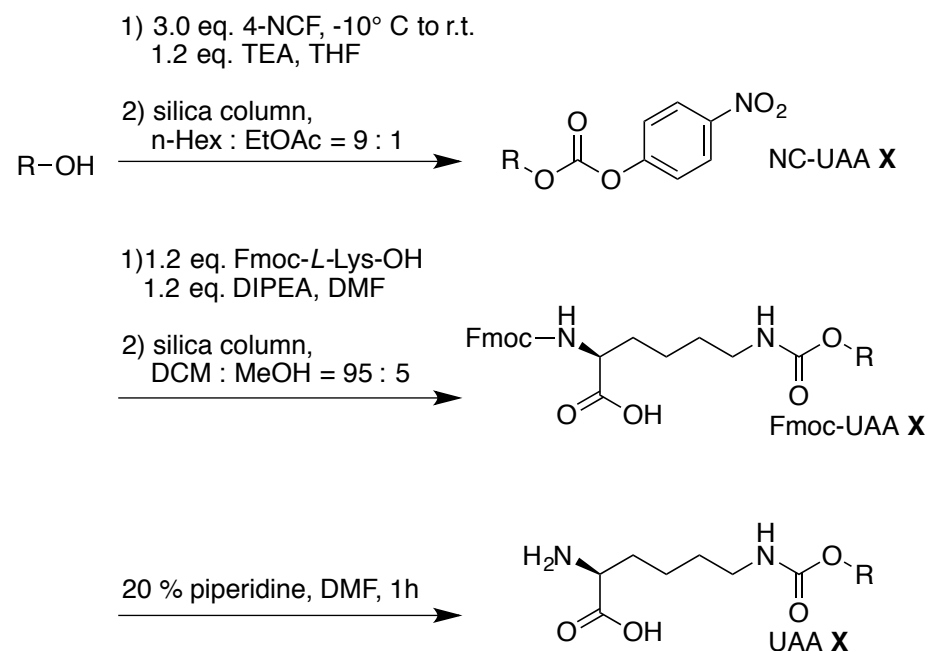

### S2.2.2 Synthesis of the Nitrophenol-Carbamate Precursor (NC-ncAA)

Alcohol (1.54 g, 10.0 mmol) and TEA (1.70 ml, 12 mmol, 1.2 eq) were dissolved in THF (40 ml) and dripped into a stirred solution of 4-nitrophenyl chloroformate (4-NCF, 6.04 g, 30 mmol, 3.0 eq) in THF (36 ml) over a period of 1 h at  $-10^\circ\text{C}$ . The reaction mixture was allowed to warm to room temperature and was stirred overnight. THF was removed *in vacuo*, and water was added to the residue. The mixture was extracted three times

with EtOAc. The collected organic phase were dried on MgSO<sub>4</sub> following by column chromatography (n-hexane : EtOAc = 9 : 1) to yield the desired yellow-oil product.

### **S2.2.3 Synthesis of the Fmoc-Protected ncAA (Fmoc-ncAA)**

Fmoc-*L*-Lys-OH (Novabiochem, 0.69 g, 1.87 mmol, 1.2 eq.) was suspended under argon in anhydrous DMF (0.2 M, 8 ml) containing DIEA (0.24 g, 0.33 ml, 1.87 mmol, 1.2 eq.). To this white suspension, a clear solution of the nitrophenol-carbamate precursor (1.56 mmol, 1.0 eq.) in anhydrous DMF (0.2 M, 8 ml) was added dropwise under argon at room temperature over a period of 2 h. The reaction mixture was stirred for an additional 4 h at room temperature. H<sub>2</sub>O (50 ml) and EtOAc (150 ml) were added and the aqueous layer was adjusted to a pH range of 1–3 with 1 N HCl. The phases were separated and the aqueous layer was extracted with EtOAc (2 x 50 ml). The organic layers were washed with saturated NaCl solution (2 x 50 ml) and dried on Na<sub>2</sub>SO<sub>4</sub>. All volatiles were evaporated under reduced pressure and the crude product was purified by column chromatography (DCM : MeOH 95 : 5 v/v) to yield the Fmoc-protected ncAA as a white solid.

### **S2.2.4 Deprotection of the Fmoc-ncAA**

The Fmoc-protected ncAA was dissolved in 20% piperidine in DMF (20 ml per mmol of ncAA) and stirred for 1 h at room temperature. All volatiles were removed under reduced pressure to yield the pure compound as a solid.

### S2.3.1 Synthesis of ncAA 28

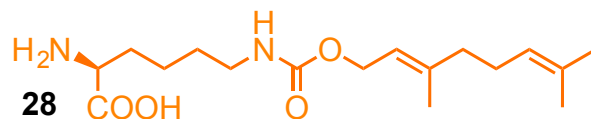

#### NC-ncAA 28

<sup>1</sup>H-NMR (CDCl<sub>3</sub>, 400 MHz): δ = 1.63 (s, 3H), 1.70 (s, 3H), 1.83 (s, 3H), 2.15 (m, 4H), 4.78 (d, 2H, *J* = 4.0 Hz), 5.10 (m, 1H), 5.47 (t, 1H, *J* = 8.0 Hz), 7.40 (d, 2H, *J* = 12.0 Hz), 8.29 (d, 2H, *J* = 8.0 Hz).

#### Fmoc-ncAA 28

<sup>1</sup>H-NMR (CDCl<sub>3</sub>, 400 MHz): δ = 1.62 (s, 3H), 1.70 (s, 3H), 1.76 (s, 3H), 1.44-1.91 (m, 6H), 2.09 (m, 2H), 3.16 (m, 2H), 4.41 (m, 2H), 4.59 (m, 2H), 5.11 (m, 2H), 5.35 (m, 1H), 5.97 (d, *J* = 4.0 Hz), 7.31 (t, 2H, *J* = 8.0 Hz), 7.39 (t, 2H, *J* = 6.0 Hz), 7.55-7.63 (m, 2H), 7.66 (d, *J* = 8.0 Hz).

<sup>13</sup>C-NMR (CDCl<sub>3</sub>, 100 MHz): δ = 176.25, 176.03, 175.63, 171.51, 157.13, 156.44, 143.96, 143.78, 142.14, 141.34, 132.12, 127.13, 123.69, 120.00, 67.14, 60.57, 53.70, 47.21, 40.63, 32.20, 29.41, 26.72, 25.72, 22.38, 21.07, 20.79, 17.70, 14.22.

#### ncAA 28

<sup>1</sup>H-NMR (D<sub>2</sub>O, 400 MHz): δ = 1.64 (s, 3H), 1.71 (s, 3H), 1.75 (s, 3H), 1.20-1.91 (m, 6H), 2.16 (m, 2H), 3.15 (m, 2H), 3.75 (m, 1H), 4.55 (m, 2H), 4.59 (m, 2H), 5.42 (m, 1H).

### S2.3.2 Synthesis of ncAA **29**

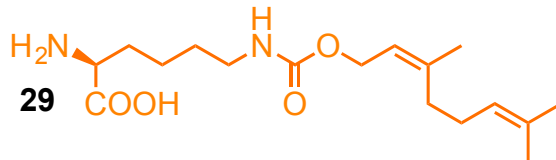

#### NC-ncAA **29**

$^1\text{H-NMR}$  ( $\text{CDCl}_3$ , 400 MHz):  $\delta$  = 1.62 (s, 3H), 1.70 (s, 3H), 1.78 (s, 3H), 2.12 (m, 4H), 4.82 (d, 2H,  $J$  = 8.0 Hz), 5.10 (m, 1H), 5.47 (t, 1H,  $J$  = 8.0 Hz), 7.40 (d, 2H,  $J$  = 8.0 Hz), 8.29 (d, 2H,  $J$  = 8.0 Hz).

#### Fmoc-ncAA **29**

$^1\text{H-NMR}$  ( $\text{CDCl}_3$ , 400 MHz):  $\delta$  = 1.61 (s, 3H), 1.64 (s, 3H), 1.69 (s, 3H), 1.43-1.91 (m, 6H), 2.07 (m, 2H), 3.20 (m, 2H), 4.22 (m, 1H), 4.40 (m, 2H), 4.66-4.82 (m, 2H), 5.09 (m, 2H), 5.33 (m, 1H), 7.29 (t, 2H,  $J$  = 6.0 Hz), 7.38 (t, 2H,  $J$  = 6.0 Hz), 7.61 (m, 2H), 7.76 (d,  $J$  = 8.0 Hz).

$^{13}\text{C-NMR}$  ( $\text{CDCl}_3$ , 100 MHz):  $\delta$  = 176.03, 175.20, 157.13, 156.35, 144.01, 143.88, 142.58, 141.29, 131.79, 127.07, 123.76, 119.96, 67.23, 62.00, 53.88, 47.15, 39.54, 31.73, 26.31, 25.69, 22.56, 17.70, 16.47.

#### ncAA **29**

$^1\text{H-NMR}$  ( $\text{D}_2\text{O}$ , 400 MHz):  $\delta$  = 1.60 (s, 3H), 1.66 (s, 3H), 1.70 (s, 3H), 1.46-1.89 (m, 6H), 2.05 (m, 2H), 3.11 (m, 2H), 3.67 (m, 1H), 4.55 (m, 2H), 5.32 (m, 1H).
